# Supplementary material for: Mechanistic insights into aryl nickel-catalyzed benzylic dehydrogenation of electron-deficient heteroarenes by using DFT calculations
Source: Royal Society of Chemistry journal article supplement (doi:10.1039/d1nj03119h), 2021-01-01
Supplement: d1nj03119h1.pdf [file d1nj03119h1.pdf]

## Supporting Information

### **Mechanistic insight into aryl-nickel-catalyzed benzylic dehydrogenation of electron-deficient heteroarenes by using DFT calculations**

Feiyun Jia\* and Bo Zhang \*

School of Basic Medical Sciences, North Sichuan Medical College, Nanchong, Sichuan 637100, P. R. China

E-mail: jiafy@nsmc.edu.cn; zhbo@nsmc.edu.cn

## Table of Contents

|                                                                                           |    |
|-------------------------------------------------------------------------------------------|----|
| I. Complete Gaussian 09 Reference                                                         | S3 |
| II. Influence of dispersion correction and solvent on barrier in optimization             | S4 |
| III. Possible forms of nickel catalysts in this system                                    | S5 |
| IV. Formation mechanism of Species 9 without the participation of zinc salt               | S6 |
| V. Possible competitive mechanism (reductive elimination) of $\beta$ -hydride elimination | S7 |
| VI. Cartesian Coordinates                                                                 | S8 |

## I. Complete Gaussian 09 Reference

Frisch, M. J.; Trucks, G. W.; Schlegel, H. B.; Scuseria, G. E.; Robb, M. A.; Cheeseman, J. R.; Scalmani, G.; Barone, V.; Mennucci, B.; Petersson, G. A.; Nakatsuji, H.; Caricato, M.; Li, X.; Hratchian, H. P.; Izmaylov, A. F.; Bloino, J.; Zheng, G.; Sonnenberg, J. L.; Hada, M.; Ehara, M.; Toyota, K.; Fukuda, R.; Hasegawa, J.; Ishida, M.; Nakajima, T.; Honda, Y.; Kitao, O.; Nakai, H.; Vreven, T.; Montgomery, J. A., Jr.; Peralta, J. E.; Ogliaro, F.; Bearpark, M.; Heyd, J. J.; Brothers, E.; Kudin, K. N.; Staroverov, V. N.; Kobayashi, R.; Normand, J.; Raghavachari, K.; Rendell, A.; Burant, J. C.; Iyengar, S. S.; Tomasi, J.; Cossi, M.; Rega, N.; Millam, J. M.; Klene, M.; Knox, J. E.; Cross, J. B.; Bakken, V.; Adamo, C.; Jaramillo, J.; Gomperts, R.; Stratmann, R. E.; Yazyev, O.; Austin, A. J.; Cammi, R.; Pomelli, C.; Ochterski, J. W.; Martin, R. L.; Morokuma, K.; Zakrzewski, V. G.; Voth, G. A.; Salvador, P.; Dannenberg, J. J.; Dapprich, S.; Daniels, A. D.; Farkas, Ö.; Foresman, J. B.; Ortiz, J. V.; Cioslowski, J.; Fox, D. J. Gaussian 09, revision D.01; Gaussian, Inc.: Wallingford, CT, 2010.

## II. Influence of dispersion correction and solvent on barrier in optimization

**Table S1.** Comparison of relative free energy barriers for selected key transition state optimized in gas phases without dispersion correction and in solvent phases with dispersion correction. The optimizations were performed using B3LYP/6-31G\*\*/Lan12dz method and single point energy corrections were added using M06/6-311++G\*\*/SDD method.

| Selected transition state | Optimized in gas phase without dispersion correction ( <i>kcal/mol</i> ) | Optimized in solvent phase with dispersion correction ( <i>kcal/mol</i> ) |
|---------------------------|--------------------------------------------------------------------------|---------------------------------------------------------------------------|
| ts1                       | 32.9                                                                     | 34.6                                                                      |
| ts4                       | 9.6                                                                      | 10.3                                                                      |
| ts6                       | 57.4                                                                     | 51.9                                                                      |
| ts8                       | 5.7                                                                      | 7.5                                                                       |

### III. The possible forms of nickel catalysts in this system

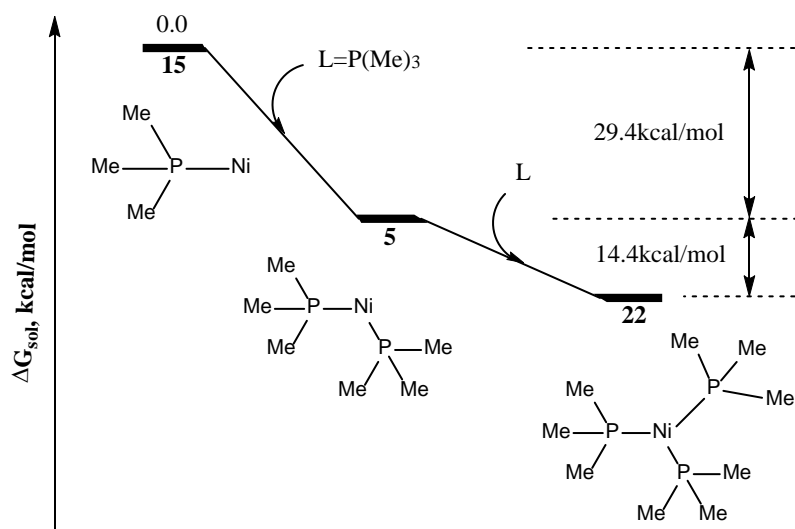

**Figure S1.** Comparison of the free energy of several possible nickel catalyst species

#### IV. Formation mechanism of species **9** without the participation of zinc salt

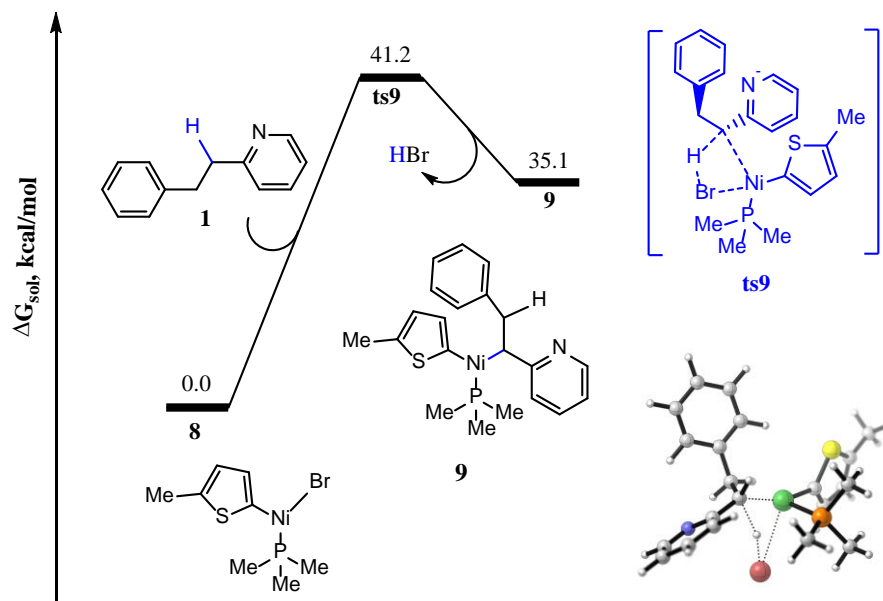

**Figure S2.** Reaction energy profile for the formation mechanism of species **9** without the participation of zinc salt

V. Possible competitive mechanism (reductive elimination) of  $\beta$ -hydride elimination

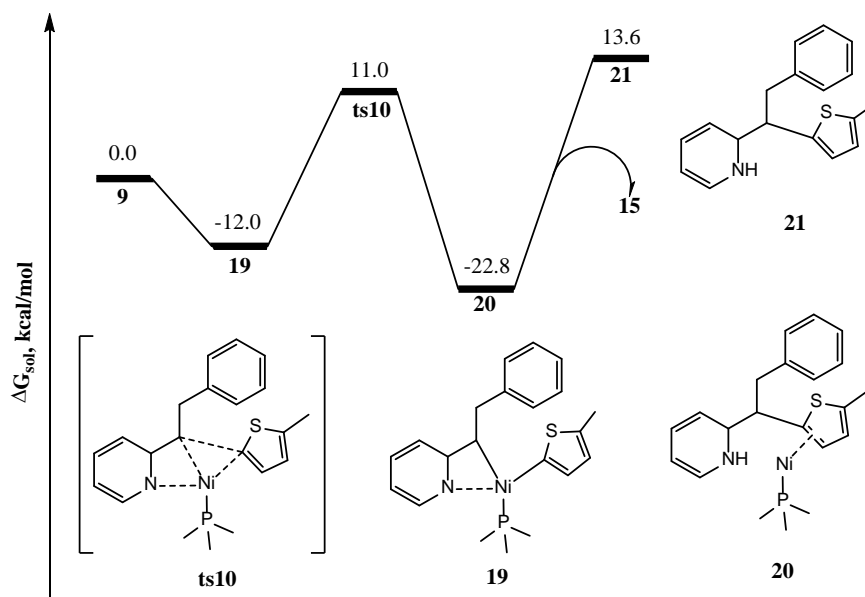

**Figure S3.** Reaction energy profile for possible competitive mechanism (reductive elimination) of  $\beta$ -hydride elimination

## VI. Cartesian Coordinates

1

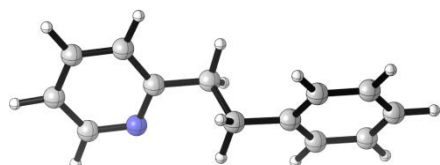

B3LYP electronic energy: -557.9895753 a.u.  
B3LYP enthalpy: -557.750287 a.u.  
B3LYP free energy: -557.803090 a.u.  
M06 SCF energy in solution: -557.676868136 a.u.  
M06 enthalpy in solution: -557.437580136 a.u.  
M06 free energy in solution: -557.490383136 a.u.

### Cartesian coordinates

| ATOM | X           | Y           | Z           |
|------|-------------|-------------|-------------|
| C    | -0.44758500 | -0.20371300 | 0.61088500  |
| H    | -0.18182100 | 0.54120400  | 1.36999800  |
| C    | -3.68503500 | 1.23765600  | -0.31314000 |
| C    | -4.60633600 | 0.19327100  | -0.22228600 |
| C    | -4.13748200 | -1.05932700 | 0.16759800  |
| C    | -2.78050000 | -1.21085900 | 0.44673300  |
| C    | -1.93006000 | -0.10379500 | 0.33116300  |
| N    | -2.38192400 | 1.10568200  | -0.04655500 |
| H    | -4.81507300 | -1.90411500 | 0.25372300  |
| H    | -4.01185300 | 2.23203200  | -0.61368400 |
| H    | -5.65397300 | 0.36166000  | -0.44988600 |
| H    | -2.38069400 | -2.17240500 | 0.75433600  |
| C    | 0.41001800  | 0.05469300  | -0.65175000 |
| H    | 0.11283500  | 1.02430000  | -1.06399800 |
| H    | 0.16797800  | -0.70161100 | -1.40781500 |
| C    | 1.89452300  | 0.03687600  | -0.36154000 |
| C    | 2.54797100  | 1.19083700  | 0.09332900  |
| C    | 2.64496700  | -1.13743200 | -0.50589000 |
| C    | 3.90935400  | 1.17214800  | 0.39646900  |
| H    | 1.98243500  | 2.11300900  | 0.20492600  |
| C    | 4.00735700  | -1.16150300 | -0.20436100 |
| H    | 2.15645900  | -2.04086900 | -0.86390800 |
| C    | 4.64432600  | -0.00568000 | 0.24914200  |
| H    | 4.39768200  | 2.07866700  | 0.74311700  |



|   |             |             |             |
|---|-------------|-------------|-------------|
| H | 4.57163400  | -2.08174900 | -0.32756000 |
| H | 5.70519300  | -0.02099200 | 0.48157500  |
| H | -0.20645100 | -1.18793700 | 1.02695100  |

2

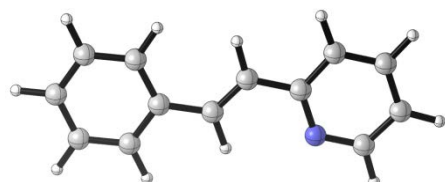

|                              |                     |
|------------------------------|---------------------|
| B3LYP electronic energy:     | -556.7678206 a.u.   |
| B3LYP enthalpy:              | -556.552491 a.u.    |
| B3LYP free energy:           | -556.603288 a.u.    |
| M06 SCF energy in solution:  | -556.455757474 a.u. |
| M06 enthalpy in solution:    | -556.240427474 a.u. |
| M06 free energy in solution: | -556.291224474 a.u. |

Cartesian coordinates

| ATOM | X           | Y           | Z           |
|------|-------------|-------------|-------------|
| C    | -0.51939900 | -0.55929700 | -0.00006100 |
| C    | -3.62921500 | 1.32923100  | -0.00008500 |
| C    | -4.63803600 | 0.36129600  | 0.00002400  |
| C    | -4.25526500 | -0.97870600 | 0.00010000  |
| C    | -2.89896400 | -1.28900400 | 0.00006300  |
| C    | -1.95220200 | -0.24856500 | -0.00007000 |
| N    | -2.32664400 | 1.04943300  | -0.00010200 |
| H    | -5.00001500 | -1.76949000 | 0.00020200  |
| H    | -3.88890800 | 2.38705300  | -0.00006200 |
| H    | -5.68271500 | 0.65441000  | 0.00006500  |
| H    | -2.56489000 | -2.32235100 | 0.00017000  |
| C    | 0.45187700  | 0.37472100  | 0.00003700  |
| H    | 0.12709500  | 1.41308300  | 0.00001500  |
| C    | 1.89897100  | 0.15522700  | 0.00003000  |
| C    | 2.74983000  | 1.27637800  | 0.00007100  |
| C    | 2.49386300  | -1.12224600 | -0.00005600 |
| C    | 4.13554900  | 1.13285300  | 0.00006500  |
| H    | 2.30954100  | 2.26997100  | 0.00012300  |
| C    | 3.87697200  | -1.26627600 | -0.00005700 |
| H    | 1.86881900  | -2.00977200 | -0.00013500 |
| C    | 4.70621800  | -0.14017800 | 0.00000800  |
| H    | 4.76937600  | 2.01493200  | 0.00008100  |
| H    | 4.31334500  | -2.26108800 | -0.00011500 |
| H    | 5.78589400  | -0.25681200 | 0.00002300  |

H -0.27222000 -1.61857800 -0.00006900

3

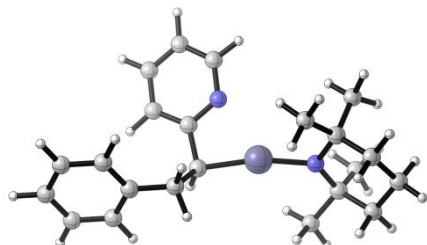

B3LYP electronic energy: -1031.5322184 a.u.  
B3LYP enthalpy: -1031.031644 a.u.  
B3LYP free energy: -1031.117881 a.u.  
M06 SCF energy in solution: -1192.62827997 a.u.  
M06 enthalpy in solution: -1192.12770497 a.u.  
M06 free energy in solution: -1192.21394297 a.u.

#### Cartesian coordinates

| ATOM | X           | Y           | Z           |
|------|-------------|-------------|-------------|
| C    | -1.33086900 | -0.42929400 | -0.47806300 |
| Zn   | 0.70230700  | -0.15707400 | -0.19217500 |
| H    | -1.61424300 | -0.92804500 | -1.41308300 |
| C    | -0.84042300 | 3.18892500  | -0.19219800 |
| C    | -2.01337600 | 3.78604800  | -0.64303100 |
| C    | -3.04898500 | 2.95475600  | -1.07574800 |
| C    | -2.88056300 | 1.57321700  | -1.03277900 |
| C    | -1.66932800 | 1.03751800  | -0.56390200 |
| N    | -0.66881000 | 1.85905700  | -0.15949900 |
| H    | -3.97897700 | 3.38100800  | -1.44219300 |
| H    | 0.00205900  | 3.78879900  | 0.14411100  |
| H    | -2.10707300 | 4.86678100  | -0.66311700 |
| H    | -3.67145900 | 0.90579900  | -1.35531900 |
| C    | -2.03327000 | -1.17556800 | 0.69417700  |
| H    | -1.61669100 | -2.18937800 | 0.74133800  |
| H    | -1.77770300 | -0.69492600 | 1.64702200  |
| C    | -3.54449200 | -1.27452700 | 0.58578400  |
| C    | -4.13843900 | -2.14227400 | -0.34436200 |
| C    | -4.38557900 | -0.49460200 | 1.39073500  |
| C    | -5.52498700 | -2.22421900 | -0.46927800 |
| H    | -3.50414200 | -2.76281700 | -0.97383700 |
| C    | -5.77534200 | -0.57340300 | 1.27142400  |
| H    | -3.94500300 | 0.17990700  | 2.12108300  |
| C    | -6.35030500 | -1.43777000 | 0.33946300  |

|   |             |             |             |
|---|-------------|-------------|-------------|
| H | -5.96311400 | -2.90689500 | -1.19249600 |
| H | -6.40743400 | 0.03909600  | 1.90885900  |
| H | -7.43062300 | -1.50318500 | 0.24596900  |
| N | 2.60873600  | -0.30379800 | 0.04192700  |
| C | 4.54079800  | -1.85544000 | -0.20814600 |
| C | 3.39676600  | -1.08996400 | -0.92310500 |
| C | 3.29032900  | 0.51790500  | 1.05772700  |
| C | 4.44496100  | -0.27347200 | 1.72705400  |
| C | 5.36697400  | -0.95474000 | 0.71323900  |
| H | 4.09089200  | -2.65323500 | 0.39814800  |
| H | 5.18275900  | -2.34258700 | -0.95350600 |
| H | 5.01595700  | 0.39526400  | 2.38422900  |
| H | 4.00204800  | -1.04872800 | 2.36679800  |
| H | 5.91591500  | -0.20608500 | 0.12761900  |
| H | 6.12794200  | -1.54758800 | 1.23570000  |
| C | 3.97674600  | -0.24527100 | -2.09160700 |
| H | 4.41991500  | -0.88810600 | -2.86244600 |
| H | 3.17939300  | 0.34499400  | -2.55584700 |
| H | 4.75218500  | 0.44990900  | -1.76434300 |
| C | 2.26024600  | 0.85519600  | 2.15527200  |
| H | 2.71762900  | 1.42821500  | 2.96932600  |
| H | 1.44058300  | 1.46779200  | 1.75631100  |
| H | 1.84003000  | -0.06273000 | 2.58222100  |
| C | 2.46007200  | -2.13654800 | -1.55835900 |
| H | 1.65713500  | -1.65433700 | -2.13547900 |
| H | 3.00139800  | -2.78386200 | -2.25652000 |
| H | 2.00485600  | -2.76817300 | -0.78779800 |
| C | 3.82487600  | 1.87076600  | 0.51135700  |
| H | 3.02719600  | 2.39737000  | -0.02311700 |
| H | 4.17657600  | 2.51523300  | 1.32676700  |
| H | 4.65845300  | 1.74247500  | -0.18208400 |

4

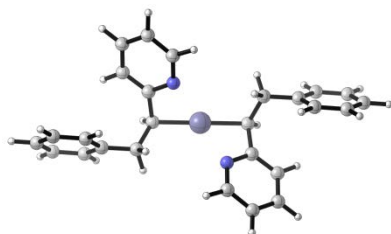

B3LYP electronic energy: -1180.324118 a.u.  
 B3LYP enthalpy: -1179.866474 a.u.  
 B3LYP free energy: -1179.956816 a.u.  
 M06 SCF energy in solution: -1341.33893416 a.u.

M06 enthalpy in solution: -1340.88129016 a.u.

M06 free energy in solution: -1340.97163216 a.u.

Cartesian coordinates

| ATOM | X           | Y           | Z           |
|------|-------------|-------------|-------------|
| C    | -2.08619100 | 0.03460500  | -0.93243700 |
| Zn   | 0.00000000  | 0.00007200  | -0.72738000 |
| H    | -2.51981600 | 0.09662300  | -1.93738300 |
| C    | -1.16741300 | 2.87445100  | 1.18348900  |
| C    | -2.24811200 | 3.75086300  | 1.16505800  |
| C    | -3.36581100 | 3.39915400  | 0.40419000  |
| C    | -3.36804600 | 2.19232400  | -0.28941200 |
| C    | -2.24288100 | 1.35193300  | -0.22534600 |
| N    | -1.15673000 | 1.71902900  | 0.50330500  |
| H    | -4.22818100 | 4.05897000  | 0.35772200  |
| H    | -0.26671100 | 3.10769900  | 1.74674600  |
| H    | -2.20909700 | 4.68288500  | 1.71918900  |
| H    | -4.22809000 | 1.88701800  | -0.87492700 |
| C    | -2.76164100 | -1.15236200 | -0.18467000 |
| H    | -2.48989200 | -2.07761500 | -0.70771500 |
| H    | -2.34455700 | -1.23759800 | 0.82668400  |
| C    | -4.27447300 | -1.07100500 | -0.08756000 |
| C    | -5.07877000 | -1.35885000 | -1.20165400 |
| C    | -4.90995500 | -0.68282500 | 1.09990000  |
| C    | -6.46824100 | -1.26051500 | -1.13285600 |
| H    | -4.60638100 | -1.66760700 | -2.13186400 |
| C    | -6.30131700 | -0.58264000 | 1.17541900  |
| H    | -4.30617000 | -0.46082500 | 1.97675500  |
| C    | -7.08634500 | -0.87057800 | 0.05852100  |
| H    | -7.07062900 | -1.49462500 | -2.00672900 |
| H    | -6.77090700 | -0.28264500 | 2.10857100  |
| H    | -8.16876800 | -0.79687100 | 0.11505700  |
| C    | 2.08620400  | -0.03446900 | -0.93231600 |
| H    | 2.51980400  | -0.09646100 | -1.93727700 |
| C    | 1.16724100  | -2.87452100 | 1.18325900  |
| C    | 2.24795000  | -3.75092200 | 1.16486100  |
| C    | 3.36572500  | -3.39913000 | 0.40414300  |
| C    | 3.36801700  | -2.19223600 | -0.28934800 |
| C    | 2.24283600  | -1.35186200 | -0.22532500 |
| N    | 1.15661900  | -1.71903400 | 0.50318700  |
| H    | 4.22810900  | -4.05892900 | 0.35770400  |
| H    | 0.26647700  | -3.10783200 | 1.74639200  |
| H    | 2.20888800  | -4.68299600 | 1.71890000  |
| H    | 4.22811600  | -1.88688000 | -0.87475700 |

|   |            |            |             |
|---|------------|------------|-------------|
| C | 2.76173200 | 1.15243300 | -0.18452000 |
| H | 2.49001400 | 2.07770900 | -0.70753700 |
| H | 2.34467300 | 1.23765800 | 0.82684300  |
| C | 4.27455900 | 1.07100200 | -0.08746300 |
| C | 5.07883100 | 1.35906100 | -1.20152100 |
| C | 4.91006300 | 0.68251600 | 1.09988500  |
| C | 6.46829900 | 1.26063900 | -1.13279700 |
| H | 4.60641700 | 1.66805200 | -2.13164000 |
| C | 6.30142300 | 0.58224500 | 1.17533100  |
| H | 4.30630100 | 0.46034900 | 1.97671400  |
| C | 7.08642500 | 0.87040000 | 0.05847100  |
| H | 7.07066700 | 1.49491600 | -2.00663800 |
| H | 6.77103100 | 0.28201700 | 2.10839900  |
| H | 8.16884600 | 0.79662600 | 0.11495200  |

5

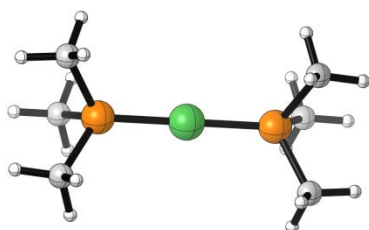

B3LYP electronic energy: -1091.5479367 a.u.  
 B3LYP enthalpy: -1091.302258 a.u.  
 B3LYP free energy: -1091.363370 a.u.  
 M06 SCF energy in solution: -1093.04565715 a.u.  
 M06 enthalpy in solution: -1092.79997815 a.u.  
 M06 free energy in solution: -1092.86109015 a.u.

Cartesian coordinates

| ATOM | X           | Y           | Z           |
|------|-------------|-------------|-------------|
| Ni   | 0.00014500  | 0.00012300  | 0.00061700  |
| P    | -2.14475000 | -0.00010400 | -0.00082100 |
| C    | -2.99751000 | 0.30692900  | 1.62283900  |
| H    | -4.08893300 | 0.28724700  | 1.52397100  |
| H    | -2.68976300 | -0.45509400 | 2.34408400  |
| H    | -2.69148500 | 1.28117200  | 2.01376600  |
| C    | -3.00530500 | 1.25063600  | -1.07464200 |
| H    | -2.70607500 | 1.10315700  | -2.11604900 |
| H    | -4.09615600 | 1.17236300  | -1.00077900 |
| H    | -2.69798300 | 2.25700700  | -0.77715400 |
| C    | -3.00291500 | -1.55769500 | -0.54465400 |
| H    | -4.09407200 | -1.45826300 | -0.51134200 |

|   |             |             |             |
|---|-------------|-------------|-------------|
| H | -2.69749400 | -1.80333600 | -1.56550100 |
| H | -2.69925600 | -2.38444000 | 0.10361700  |
| P | 2.14507100  | 0.00058000  | -0.00022100 |
| C | 3.00034500  | 1.39195700  | -0.88884100 |
| H | 4.09151400  | 1.30436800  | -0.83570600 |
| H | 2.69257100  | 1.39604100  | -1.93809400 |
| H | 2.69632600  | 2.34497700  | -0.44721700 |
| C | 3.00523600  | 0.07179800  | 1.64713600  |
| H | 2.69935100  | -0.78582700 | 2.25254400  |
| H | 4.09623500  | 0.06454800  | 1.54108600  |
| H | 2.70345700  | 0.97995200  | 2.17639700  |
| C | 2.99944600  | -1.46455000 | -0.76226900 |
| H | 4.09083000  | -1.37651300 | -0.71128200 |
| H | 2.68951600  | -2.37526900 | -0.24242200 |
| H | 2.69676700  | -1.55711300 | -1.80899000 |

6

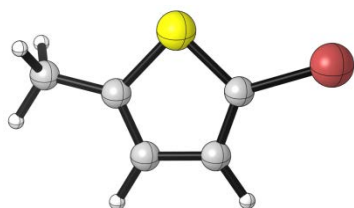

B3LYP electronic energy: -604.8751531 a.u.  
 B3LYP enthalpy: -604.782352 a.u.  
 B3LYP free energy: -604.823763 a.u.  
 M06 SCF energy in solution: -604.9532996 a.u.  
 M06 enthalpy in solution: -604.8604986 a.u.  
 M06 free energy in solution: -604.9019096 a.u.

Cartesian coordinates

| ATOM | X           | Y           | Z           |
|------|-------------|-------------|-------------|
| C    | 0.24751400  | 0.26473200  | 0.00019300  |
| C    | -0.35545200 | 1.48629600  | -0.00015200 |
| C    | -1.78198200 | 1.36840900  | 0.00008200  |
| C    | -2.23960100 | 0.07859100  | -0.00014400 |
| S    | -0.89446600 | -1.04715100 | -0.00005200 |
| H    | 0.18363100  | 2.42521900  | -0.00026500 |
| H    | -2.44891400 | 2.22421600  | 0.00022900  |
| C    | -3.65702400 | -0.41087100 | 0.00005600  |
| H    | -3.88108700 | -1.02069800 | -0.88243100 |
| H    | -3.88208500 | -1.01662900 | 0.88509400  |
| H    | -4.33859600 | 0.44437500  | -0.00230100 |

Br 2.15422200 -0.08642900 0.00000900

7

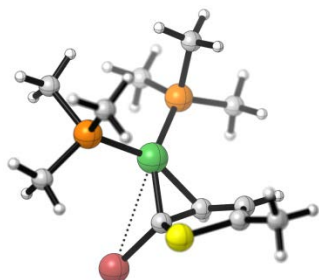

B3LYP electronic energy: -1696.4597147 a.u.  
B3LYP enthalpy: -1696.118948 a.u.  
B3LYP free energy: -1696.202034 a.u.  
M06 SCF energy in solution: -1698.05570577 a.u.  
M06 enthalpy in solution: -1697.71493877 a.u.  
M06 free energy in solution: -1697.79802477 a.u.

Cartesian coordinates

| ATOM | X           | Y           | Z           |
|------|-------------|-------------|-------------|
| C    | 1.42865900  | -0.20791600 | 0.35439700  |
| C    | 0.85369000  | -1.42780400 | 0.84784200  |
| C    | 1.16795200  | -2.54678100 | -0.03435400 |
| C    | 1.96623700  | -2.25301600 | -1.08952100 |
| S    | 2.43804400  | -0.53888400 | -1.09983400 |
| H    | 0.68969200  | -1.59047100 | 1.90970900  |
| H    | 0.81139200  | -3.55690300 | 0.15052700  |
| Ni   | -0.47342800 | -0.06171400 | 0.17125700  |
| Br   | 2.25874200  | 1.10226000  | 1.68920600  |
| P    | -2.47494000 | -0.97876800 | 0.56544200  |
| C    | -2.50430700 | -2.64941100 | 1.36887500  |
| H    | -3.52563600 | -3.01345900 | 1.52427800  |
| H    | -1.96123100 | -3.36014100 | 0.74020000  |
| H    | -1.99317300 | -2.59688500 | 2.33418500  |
| C    | -3.60033700 | -0.03188100 | 1.69727200  |
| H    | -3.80024400 | 0.95661100  | 1.27542200  |
| H    | -4.55098100 | -0.55146900 | 1.85869400  |
| H    | -3.10412900 | 0.10965400  | 2.66163700  |
| C    | -3.59217200 | -1.28881000 | -0.88611300 |
| H    | -4.53923500 | -1.74826800 | -0.58283500 |
| H    | -3.80484000 | -0.34769700 | -1.40122800 |
| H    | -3.08736400 | -1.95254100 | -1.59404600 |
| P    | -0.78474600 | 1.82846600  | -0.99419000 |
| C    | 0.48058200  | 3.17283400  | -0.86840300 |

|   |             |             |             |
|---|-------------|-------------|-------------|
| H | 0.27243900  | 3.98562900  | -1.57258600 |
| H | 0.49667600  | 3.56766500  | 0.15019300  |
| H | 1.46951600  | 2.75742600  | -1.07463200 |
| C | -0.74257500 | 1.46108400  | -2.81101400 |
| H | -1.56331200 | 0.78611600  | -3.07009700 |
| H | -0.82394100 | 2.37196100  | -3.41394700 |
| H | 0.19893400  | 0.95566700  | -3.04285000 |
| C | -2.34649900 | 2.82923900  | -0.86386000 |
| H | -2.35084900 | 3.66810000  | -1.56814600 |
| H | -3.21669100 | 2.19762800  | -1.06639000 |
| H | -2.44251300 | 3.22405200  | 0.15199600  |
| C | 2.43121700  | -3.16094000 | -2.18717600 |
| H | 2.10552600  | -4.18609800 | -1.98611300 |
| H | 2.02777700  | -2.86596000 | -3.16399800 |
| H | 3.52412200  | -3.16461300 | -2.27648500 |

8

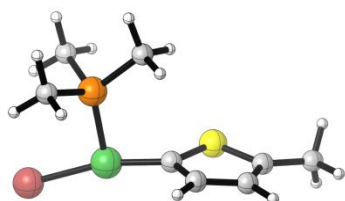

|                              |                     |
|------------------------------|---------------------|
| B3LYP electronic energy:     | -1235.372981 a.u.   |
| B3LYP enthalpy:              | -1235.153775 a.u.   |
| B3LYP free energy:           | -1235.219662 a.u.   |
| M06 SCF energy in solution:  | -1237.03262984 a.u. |
| M06 enthalpy in solution:    | -1236.81342384 a.u. |
| M06 free energy in solution: | -1236.87931084 a.u. |

Cartesian coordinates

| ATOM | X           | Y           | Z           |
|------|-------------|-------------|-------------|
| Ni   | -0.51316600 | -0.56046100 | 0.13438200  |
| Br   | -2.69520700 | -1.44484000 | -0.06817900 |
| P    | -0.96803200 | 1.52634200  | -0.03456300 |
| C    | 0.38400000  | 2.76818600  | 0.02018900  |
| H    | -0.02937000 | 3.77739900  | -0.07583100 |
| H    | 0.92751400  | 2.67738000  | 0.96233500  |
| H    | 1.08735300  | 2.57896200  | -0.79325900 |
| C    | -1.84605300 | 1.88556500  | -1.60896600 |
| H    | -2.72714700 | 1.24446400  | -1.67189900 |
| H    | -2.13715300 | 2.94022500  | -1.65478100 |
| H    | -1.18900900 | 1.65613400  | -2.45167600 |
| C    | -2.12212200 | 2.05334500  | 1.29584200  |
| H    | -2.40887300 | 3.10165000  | 1.16199500  |



|   |             |             |             |
|---|-------------|-------------|-------------|
| H | -3.00505900 | 1.41227000  | 1.26707700  |
| H | -1.63701800 | 1.93429400  | 2.26787100  |
| C | 1.30570200  | -0.29245900 | 0.36105800  |
| C | 2.04589500  | -0.24043700 | 1.52349700  |
| S | 2.39542000  | -0.36174800 | -1.01576400 |
| C | 3.45859200  | -0.31262300 | 1.31689400  |
| H | 1.59618400  | -0.16566300 | 2.50893700  |
| C | 3.82477800  | -0.37867700 | -0.00331200 |
| H | 4.18417400  | -0.32308800 | 2.12464300  |
| C | 5.20287600  | -0.49770600 | -0.58237200 |
| H | 5.94792400  | -0.43872700 | 0.21638100  |
| H | 5.34580800  | -1.45208000 | -1.10263600 |
| H | 5.41731600  | 0.30075700  | -1.30188400 |

9

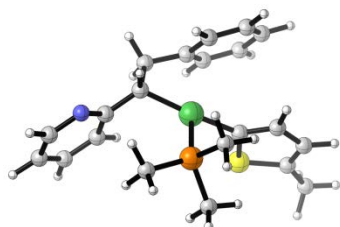

B3LYP electronic energy: -1779.5069362 a.u.  
 B3LYP enthalpy: -1779.062715 a.u.  
 B3LYP free energy: -1779.151485 a.u.  
 M06 SCF energy in solution: -1780.70373401 a.u.  
 M06 enthalpy in solution: -1780.25951301 a.u.  
 M06 free energy in solution: -1780.34828201 a.u.

Cartesian coordinates

| ATOM | X           | Y           | Z           |
|------|-------------|-------------|-------------|
| C    | -1.69698300 | -0.55976100 | -0.08481700 |
| C    | -2.81033200 | -0.73589500 | -0.87751100 |
| C    | -3.96799900 | -1.25636700 | -0.20832400 |
| C    | -3.77021700 | -1.50699900 | 1.12220400  |
| S    | -2.11847900 | -1.08855900 | 1.54485100  |
| H    | -2.82014000 | -0.47965400 | -1.93383700 |
| H    | -4.91984200 | -1.43582500 | -0.70123900 |
| C    | -4.74728500 | -2.03337500 | 2.13114500  |
| H    | -4.40077300 | -2.96441700 | 2.59605500  |
| H    | -4.92945000 | -1.31737800 | 2.94201300  |
| H    | -5.70797100 | -2.23991400 | 1.64916100  |
| Ni   | 0.07181600  | 0.20128700  | -0.33281100 |
| P    | 0.74125600  | -1.69252400 | -1.15983200 |
| C    | 0.10545500  | -1.83766600 | -2.88692900 |

|   |             |             |             |
|---|-------------|-------------|-------------|
| H | 0.39471900  | -2.79827700 | -3.32569300 |
| H | -0.98285800 | -1.75642000 | -2.87309400 |
| H | 0.51440000  | -1.02858200 | -3.49751900 |
| C | 2.53498000  | -2.06426700 | -1.36561800 |
| H | 2.99551200  | -2.20710300 | -0.38514200 |
| H | 2.66034300  | -2.97838100 | -1.95542400 |
| H | 3.04838100  | -1.23152500 | -1.84931600 |
| C | 0.13586700  | -3.23958100 | -0.36039200 |
| H | 0.51174300  | -4.11407700 | -0.90177800 |
| H | 0.48594800  | -3.28016600 | 0.67410200  |
| H | -0.95424000 | -3.24235700 | -0.35113400 |
| C | 5.19567000  | 0.04699900  | 0.24706100  |
| C | 5.24392800  | -0.32103700 | 1.58998100  |
| C | 4.07454100  | -0.17326100 | 2.34182900  |
| C | 2.93580800  | 0.32934800  | 1.72617300  |
| C | 2.97159900  | 0.68674800  | 0.35860200  |
| N | 4.10797400  | 0.53665600  | -0.36092800 |
| H | 4.05271900  | -0.45064300 | 3.39265800  |
| H | 6.08217000  | -0.05323300 | -0.37888700 |
| H | 6.15889900  | -0.70685700 | 2.02794900  |
| H | 2.01326800  | 0.43952200  | 2.28886700  |
| C | 1.78450300  | 1.22689800  | -0.34843100 |
| H | 2.08194000  | 1.46302700  | -1.37441700 |
| C | 1.14983000  | 2.46240100  | 0.32946700  |
| H | 1.25011000  | 2.40245700  | 1.41759400  |
| H | 1.66187900  | 3.38880000  | 0.02593100  |
| C | -0.33171300 | 2.55882900  | -0.01747300 |
| C | -1.31815400 | 2.65710800  | 0.98068200  |
| C | -0.74192400 | 2.61405500  | -1.36653600 |
| C | -2.66084900 | 2.82214800  | 0.64891100  |
| H | -1.02008700 | 2.60992900  | 2.02484200  |
| C | -2.08729700 | 2.78280900  | -1.69818100 |
| H | 0.00673400  | 2.57262100  | -2.15273900 |
| C | -3.04751200 | 2.88692800  | -0.69144000 |
| H | -3.40679300 | 2.89109400  | 1.43485400  |
| H | -2.38327200 | 2.83784600  | -2.74196000 |
| H | -4.09465800 | 3.01531800  | -0.94919400 |

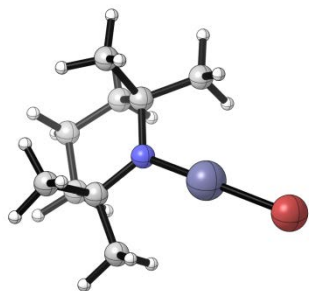

B3LYP electronic energy: -487.3888414 a.u.  
 B3LYP enthalpy: -487.113489 a.u.  
 B3LYP free energy: -487.172063 a.u.  
 M06 SCF energy in solution: -648.959480017 a.u.  
 M06 enthalpy in solution: -648.684127017 a.u.  
 M06 free energy in solution: -648.742701017 a.u.

Cartesian coordinates

| ATOM | X           | Y           | Z           |
|------|-------------|-------------|-------------|
| Zn   | 1.00439400  | -0.00003000 | 0.03541800  |
| N    | -0.87855400 | -0.00013000 | 0.05220300  |
| C    | -2.78168200 | -1.25661800 | -0.90967300 |
| C    | -1.59838900 | -1.28618100 | 0.09189700  |
| C    | -1.59796700 | 1.28616900  | 0.09186800  |
| C    | -2.78118600 | 1.25699400  | -0.90975800 |
| C    | -3.64603900 | 0.00036100  | -0.76389600 |
| H    | -2.37027400 | -1.28201600 | -1.92740000 |
| H    | -3.38975600 | -2.16135000 | -0.78631200 |
| H    | -3.38892600 | 2.16197500  | -0.78658500 |
| H    | -2.36967700 | 1.28209500  | -1.92745600 |
| H    | -4.16105600 | 0.00050200  | 0.20493800  |
| H    | -4.43416300 | 0.00047500  | -1.52586100 |
| C    | -2.09584000 | -1.67327000 | 1.50862400  |
| H    | -2.48019700 | -2.69982700 | 1.51923000  |
| H    | -1.27106300 | -1.60935300 | 2.22602900  |
| H    | -2.89642500 | -1.02280800 | 1.86485000  |
| C    | -0.60936300 | 2.37902900  | -0.35488200 |
| H    | -1.08181000 | 3.36573800  | -0.38161600 |
| H    | 0.23312200  | 2.46168900  | 0.35062100  |
| H    | -0.21887800 | 2.16795000  | -1.35751000 |
| C    | -0.61010500 | -2.37925800 | -0.35508200 |
| H    | 0.23265100  | -2.46186800 | 0.35008700  |
| H    | -1.08272800 | -3.36589000 | -0.38152700 |
| H    | -0.21998200 | -2.16828100 | -1.35785900 |
| C    | -2.09541100 | 1.67339800  | 1.50857600  |
| H    | -1.27064600 | 1.60922300  | 2.22596200  |
| H    | -2.47945700 | 2.70005900  | 1.51910800  |

|    |             |             |             |
|----|-------------|-------------|-------------|
| H  | -2.89617700 | 1.02313600  | 1.86471500  |
| Br | 3.38455400  | -0.00009700 | -0.07335500 |

11

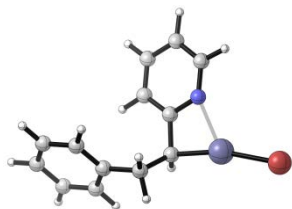

|                              |                     |
|------------------------------|---------------------|
| B3LYP electronic energy:     | -636.1882813 a.u.   |
| B3LYP enthalpy:              | -635.955623 a.u.    |
| B3LYP free energy:           | -636.019300 a.u.    |
| M06 SCF energy in solution:  | -797.676846996 a.u. |
| M06 enthalpy in solution:    | -797.444188996 a.u. |
| M06 free energy in solution: | -797.507865996 a.u. |

Cartesian coordinates

| ATOM | X           | Y           | Z           |
|------|-------------|-------------|-------------|
| C    | -0.30953800 | -0.45349600 | -0.49846200 |
| Zn   | 1.73503200  | -0.41102500 | -0.16567000 |
| H    | -0.58879500 | -0.72691000 | -1.52282500 |
| C    | 0.83725800  | 2.95131700  | 0.22622800  |
| C    | -0.25626400 | 3.78926100  | 0.04093000  |
| C    | -1.46871600 | 3.21543800  | -0.35000800 |
| C    | -1.55215900 | 1.83748500  | -0.53580800 |
| C    | -0.41272400 | 1.04560700  | -0.32661400 |
| N    | 0.75805100  | 1.62367700  | 0.04638600  |
| H    | -2.34253700 | 3.84027800  | -0.51246000 |
| H    | 1.80877400  | 3.33855000  | 0.52021800  |
| H    | -0.15815800 | 4.85894400  | 0.19126600  |
| H    | -2.48172500 | 1.37170700  | -0.83989200 |
| C    | -1.15489100 | -1.29869800 | 0.49016600  |
| H    | -0.86438400 | -2.34807300 | 0.35817100  |
| H    | -0.89255000 | -1.03758200 | 1.52257900  |
| C    | -2.66035600 | -1.18271400 | 0.32215400  |
| C    | -3.29495900 | -1.70500200 | -0.81588100 |
| C    | -3.45217900 | -0.54605200 | 1.28699300  |
| C    | -4.67398900 | -1.58864800 | -0.98683200 |
| H    | -2.70092800 | -2.21225000 | -1.57298000 |
| C    | -4.83456000 | -0.42745000 | 1.12142100  |
| H    | -2.98060000 | -0.14133700 | 2.17944300  |
| C    | -5.45015300 | -0.94674000 | -0.01763300 |
| H    | -5.14533700 | -2.00461000 | -1.87310600 |

|    |             |             |             |
|----|-------------|-------------|-------------|
| H  | -5.42869300 | 0.06834200  | 1.88427100  |
| H  | -6.52481100 | -0.85815900 | -0.14837200 |
| Br | 4.08690900  | -0.89502100 | 0.13483300  |

12

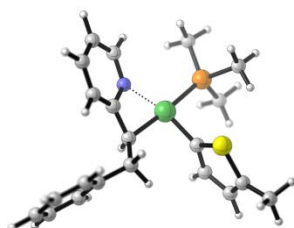

|                              |                     |
|------------------------------|---------------------|
| B3LYP electronic energy:     | -1779.5359337 a.u.  |
| B3LYP enthalpy:              | -1779.091664 a.u.   |
| B3LYP free energy:           | -1779.181649 a.u.   |
| M06 SCF energy in solution:  | -1780.72176515 a.u. |
| M06 enthalpy in solution:    | -1780.27749515 a.u. |
| M06 free energy in solution: | -1780.36748015 a.u. |

Cartesian coordinates

| ATOM | X          | Y           | Z           |
|------|------------|-------------|-------------|
| C    | 1.29279600 | 1.28473500  | 0.27792500  |
| C    | 1.43065400 | 2.21887100  | 1.28041700  |
| C    | 1.66768000 | 3.56194000  | 0.82925700  |
| C    | 1.71316700 | 3.69145600  | -0.53078900 |
| S    | 1.45701400 | 2.11575000  | -1.26693900 |
| H    | 1.35176600 | 1.96387200  | 2.33375700  |
| H    | 1.79691700 | 4.40625500  | 1.50111000  |
| C    | 1.93629400 | 4.92721500  | -1.35046400 |
| H    | 2.83138700 | 4.85190000  | -1.98043000 |
| H    | 1.09069300 | 5.14004900  | -2.01598500 |
| H    | 2.06597000 | 5.79201800  | -0.69229700 |
| Ni   | 0.90852200 | -0.57161500 | 0.31887800  |
| P    | 3.12634900 | -1.09739600 | 0.36021800  |
| C    | 4.01529800 | -0.30763200 | 1.77203800  |
| H    | 5.09354600 | -0.48925300 | 1.71988500  |
| H    | 3.81537800 | 0.76567100  | 1.75158300  |
| H    | 3.63064300 | -0.70921300 | 2.71414000  |
| C    | 3.64648600 | -2.86897000 | 0.53422600  |
| H    | 3.31438900 | -3.43811800 | -0.33842000 |
| H    | 4.73403500 | -2.96138900 | 0.62008300  |
| H    | 3.18393100 | -3.30152500 | 1.42599000  |
| C    | 4.11795200 | -0.56052400 | -1.10177000 |
| H    | 5.18576400 | -0.75039100 | -0.95164900 |

|   |             |             |             |
|---|-------------|-------------|-------------|
| H | 3.77956000  | -1.10235700 | -1.98971900 |
| H | 3.95129800  | 0.50509100  | -1.27294500 |
| C | 0.11930400  | -3.59681400 | -0.16557800 |
| C | -0.79073600 | -4.22670900 | -1.00118700 |
| C | -1.88853200 | -3.48501400 | -1.46891600 |
| C | -2.06655500 | -2.17288700 | -1.06027300 |
| C | -1.15368400 | -1.62250900 | -0.13543000 |
| N | -0.05020700 | -2.33281800 | 0.25829200  |
| H | -2.60577900 | -3.94562000 | -2.14301500 |
| H | 1.01310600  | -4.10640400 | 0.18283600  |
| H | -0.64428900 | -5.26166000 | -1.29037000 |
| H | -2.91036900 | -1.58365100 | -1.39945000 |
| C | -1.07233200 | -0.27924400 | 0.42558700  |
| H | -1.06750200 | -0.30557500 | 1.52023900  |
| C | -1.88518000 | 0.86494400  | -0.15498600 |
| H | -1.47437100 | 1.79686700  | 0.25005300  |
| H | -1.72885000 | 0.92071100  | -1.23828600 |
| C | -3.38104700 | 0.81384500  | 0.12905900  |
| C | -4.31461600 | 0.86259500  | -0.91521900 |
| C | -3.86780700 | 0.74060800  | 1.44333100  |
| C | -5.68843700 | 0.83170300  | -0.66117100 |
| H | -3.95907800 | 0.93342000  | -1.94116300 |
| C | -5.23740400 | 0.71103700  | 1.70323900  |
| H | -3.16508700 | 0.70966600  | 2.27225700  |
| C | -6.15557500 | 0.75405500  | 0.65061600  |
| H | -6.39131100 | 0.87069100  | -1.48925800 |
| H | -5.59005800 | 0.65665400  | 2.72986300  |
| H | -7.22266900 | 0.72996600  | 0.85282900  |
| C | -5.37494600 | 1.96773400  | -0.23889800 |
| C | -5.62176600 | 0.65983600  | 0.12859100  |
| C | -4.56517600 | -0.28194300 | 0.06030100  |
| N | -3.30536900 | 0.10785500  | -0.24282000 |
| H | -6.17891500 | 2.69467700  | -0.22480700 |
| H | -2.07839400 | 1.61696900  | -0.93369600 |
| O | -4.81382400 | -1.55320200 | 0.28184400  |
| H | -4.14668400 | -2.10215700 | -0.26979100 |
| C | -3.81011600 | 3.74599600  | -1.08347800 |
| C | -7.00295100 | 0.20452900  | 0.52753200  |
| F | -4.79767800 | 4.22786400  | -1.87023800 |
| F | -2.65162600 | 3.84233100  | -1.77705500 |
| F | -3.71309500 | 4.57651800  | -0.02518900 |
| F | -7.00628100 | -0.37651700 | 1.74087700  |
| F | -7.51151300 | -0.68028400 | -0.35123700 |
| F | -7.85556600 | 1.25474200  | 0.57904100  |

|   |             |             |             |
|---|-------------|-------------|-------------|
| C | -2.97163700 | -3.93397800 | -1.14708800 |
| O | -3.08719900 | -2.62619100 | -1.27649000 |
| O | -2.11408900 | -4.49605700 | -0.46798300 |
| C | -4.01760800 | -4.72213200 | -1.92495600 |
| H | -3.85977300 | -5.79435400 | -1.79466700 |
| H | -5.02272200 | -4.45526500 | -1.57877700 |
| H | -3.96579800 | -4.46287800 | -2.98787300 |
| C | 3.30367100  | 1.16862100  | -1.79279800 |
| C | 4.24051700  | 1.93514700  | -2.52519200 |
| N | 2.12985900  | 0.77624300  | -2.28654900 |
| C | 3.87249800  | 2.27307300  | -3.83213100 |
| C | 1.81411900  | 1.10400000  | -3.54279700 |
| C | 2.65159800  | 1.85908200  | -4.35924700 |
| H | 4.55794900  | 2.86230300  | -4.43678600 |
| H | 0.84850100  | 0.75125700  | -3.89982700 |
| H | 2.35908900  | 2.11346200  | -5.37351700 |
| C | 5.55770600  | 2.40749600  | -1.96636800 |
| H | 6.25966800  | 2.63501000  | -2.77524100 |
| H | 5.41126400  | 3.31346100  | -1.36873800 |
| H | 6.01638800  | 1.65884200  | -1.31396700 |

13

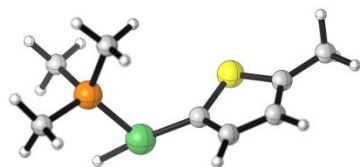

|                              |                     |
|------------------------------|---------------------|
| B3LYP electronic energy:     | -1222.720508 a.u.   |
| B3LYP enthalpy:              | -1222.497287 a.u.   |
| B3LYP free energy:           | -1222.558866 a.u.   |
| M06 SCF energy in solution:  | -1224.18854699 a.u. |
| M06 enthalpy in solution:    | -1223.96532599 a.u. |
| M06 free energy in solution: | -1224.02690499 a.u. |

Cartesian coordinates

| ATOM | X           | Y           | Z           |
|------|-------------|-------------|-------------|
| C    | -0.90189300 | 0.57309000  | -0.04931200 |
| C    | -1.67133600 | 1.29182900  | 0.85137500  |
| C    | -3.02921800 | 0.86660200  | 0.97014800  |
| C    | -3.33909000 | -0.21607400 | 0.18497900  |
| S    | -1.92195600 | -0.70018500 | -0.71766900 |
| H    | -1.27116900 | 2.12549500  | 1.42273500  |
| H    | -3.75917600 | 1.34617300  | 1.61618500  |
| C    | -4.65649800 | -0.92170300 | 0.05699500  |

|    |             |             |             |
|----|-------------|-------------|-------------|
| H  | -4.98564500 | -0.98826100 | -0.98682800 |
| H  | -4.61615200 | -1.94565100 | 0.44978600  |
| H  | -5.42626200 | -0.38019800 | 0.61555200  |
| Ni | 0.82233300  | 0.93422600  | -0.75856200 |
| P  | 2.20155600  | -0.30464800 | 0.21358900  |
| C  | 3.06501000  | -1.47436200 | -0.91636400 |
| H  | 3.76556800  | -2.10533300 | -0.36000400 |
| H  | 2.32802900  | -2.11104900 | -1.41226100 |
| H  | 3.60055800  | -0.90766100 | -1.67990600 |
| C  | 3.56442600  | 0.58674600  | 1.07224900  |
| H  | 3.14309700  | 1.26978700  | 1.81402400  |
| H  | 4.23242200  | -0.11996000 | 1.57512300  |
| H  | 4.12392400  | 1.17336100  | 0.34163200  |
| C  | 1.52448500  | -1.40817800 | 1.52652300  |
| H  | 2.31099700  | -2.03242400 | 1.96408500  |
| H  | 1.06153200  | -0.79750900 | 2.30472800  |
| H  | 0.74550800  | -2.04035500 | 1.09511200  |
| H  | 2.11407300  | 1.34023100  | -1.42091600 |

14

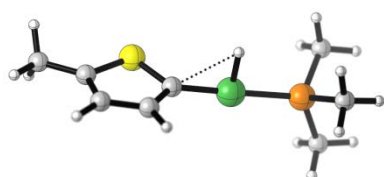

B3LYP electronic energy: -1222.7292014 a.u.  
 B3LYP enthalpy: -1222.506534 a.u.  
 B3LYP free energy: -1222.570024 a.u.  
 M06 SCF energy in solution: -1224.19193671 a.u.  
 M06 enthalpy in solution: -1223.96926971 a.u.  
 M06 free energy in solution: -1224.03275871 a.u.

Cartesian coordinates

| ATOM | X           | Y           | Z           |
|------|-------------|-------------|-------------|
| C    | -1.28824200 | 0.38536700  | -0.11348500 |
| C    | -2.07074700 | 1.52488300  | -0.04000300 |
| C    | -3.47138500 | 1.27883800  | 0.07386400  |
| C    | -3.80340800 | -0.05357200 | 0.05441500  |
| S    | -2.35421200 | -1.01725000 | -0.10547500 |
| H    | -1.64903300 | 2.52493500  | -0.06918500 |
| H    | -4.21641800 | 2.06404100  | 0.16560600  |
| C    | -5.16598200 | -0.67037700 | 0.16528700  |
| H    | -5.39822300 | -1.30981400 | -0.69453600 |



|    |             |             |             |
|----|-------------|-------------|-------------|
| H  | -5.26493200 | -1.28953500 | 1.06521100  |
| H  | -5.92846200 | 0.11284800  | 0.21486200  |
| Ni | 0.54170200  | 0.16924100  | -0.00791000 |
| P  | 2.76741800  | -0.07314400 | 0.05718200  |
| C  | 3.38948700  | -1.59922100 | -0.77816700 |
| H  | 4.48346000  | -1.64188200 | -0.78039000 |
| H  | 2.99707300  | -2.48215400 | -0.26640100 |
| H  | 3.02383000  | -1.61749100 | -1.80791600 |
| C  | 3.69845100  | 1.26574900  | -0.81143100 |
| H  | 3.49794100  | 2.22459500  | -0.32575000 |
| H  | 4.77703400  | 1.07811500  | -0.80455500 |
| H  | 3.34810500  | 1.33238000  | -1.84447500 |
| C  | 3.62181300  | -0.14655400 | 1.69943500  |
| H  | 4.70450600  | -0.26552700 | 1.58779500  |
| H  | 3.42125500  | 0.77153800  | 2.25894500  |
| H  | 3.23024000  | -0.98740700 | 2.27894500  |
| H  | 0.50216100  | 0.20911200  | -1.42627900 |

15

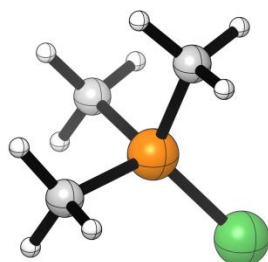

B3LYP electronic energy: -630.3819249 a.u.  
 B3LYP enthalpy: -630.257988 a.u.  
 B3LYP free energy: -630.300092 a.u.  
 M06 SCF energy in solution: -631.96261886 a.u.  
 M06 enthalpy in solution: -631.83868186 a.u.  
 M06 free energy in solution: -631.88078586 a.u.

Cartesian coordinates

| ATOM | X           | Y           | Z          |
|------|-------------|-------------|------------|
| Ni   | 1.56724100  | 0.00007000  | 0.00000500 |
| P    | -0.47160200 | -0.00000600 | 0.00028200 |
| C    | -1.31046900 | -1.49529800 | 0.71364400 |
| H    | -2.40218200 | -1.40478700 | 0.67355600 |
| H    | -1.00387700 | -2.38432500 | 0.15650500 |
| H    | -0.99938700 | -1.62536400 | 1.75338600 |
| C    | -1.31087700 | 1.36582800  | 0.93762700 |
| H    | -1.00033500 | 2.33092100  | 0.52911500 |

|   |             |             |             |
|---|-------------|-------------|-------------|
| H | -2.40254200 | 1.28528300  | 0.87922300  |
| H | -1.00418600 | 1.32938200  | 1.98614900  |
| C | -1.31045100 | 0.12928400  | -1.65157700 |
| H | -2.40222600 | 0.12072200  | -1.55317600 |
| H | -1.00228000 | 1.05500100  | -2.14442600 |
| H | -1.00092000 | -0.70760600 | -2.28288200 |

16

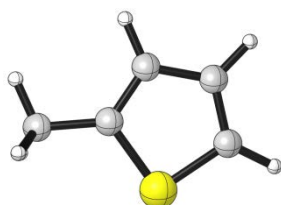

|                              |                     |
|------------------------------|---------------------|
| B3LYP electronic energy:     | -592.3306807 a.u.   |
| B3LYP enthalpy:              | -592.229335 a.u.    |
| B3LYP free energy:           | -592.265819 a.u.    |
| M06 SCF energy in solution:  | -592.208780221 a.u. |
| M06 enthalpy in solution:    | -592.107434221 a.u. |
| M06 free energy in solution: | -592.143919221 a.u. |

Cartesian coordinates

| ATOM | X           | Y           | Z           |
|------|-------------|-------------|-------------|
| C    | 1.68238200  | -0.22945700 | 0.00057800  |
| C    | 1.38712300  | 1.10314300  | -0.00010500 |
| C    | -0.02002900 | 1.35790400  | -0.00018900 |
| C    | -0.78677000 | 0.22340800  | -0.00043500 |
| S    | 0.23778800  | -1.19627200 | -0.00013300 |
| H    | 2.14185700  | 1.88147000  | -0.00016100 |
| H    | -0.45211200 | 2.35304300  | 0.00047300  |
| C    | -2.28168800 | 0.10561700  | 0.00024400  |
| H    | -2.65156600 | -0.43071200 | -0.88091700 |
| H    | -2.65132800 | -0.42433600 | 0.88537500  |
| H    | -2.73032400 | 1.10283500  | -0.00324800 |
| H    | 2.65276300  | -0.70565200 | 0.00004400  |

17

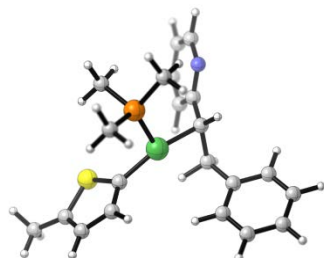

B3LYP electronic energy: -1779.51940713 a.u.  
 B3LYP enthalpy: -1779.075875 a.u.  
 B3LYP free energy: -1779.166170 a.u.  
 M06 SCF energy in solution: -1780.71133127 a.u.  
 M06 enthalpy in solution: -1780.26779927 a.u.  
 M06 free energy in solution: -1780.35809427 a.u.

Cartesian coordinates

| ATOM | X           | Y           | Z           |
|------|-------------|-------------|-------------|
| C    | -1.96321000 | -0.68513900 | -0.08323200 |
| C    | -2.61910600 | -1.81689300 | 0.35356700  |
| C    | -3.94788700 | -1.99153700 | -0.15674000 |
| C    | -4.35475300 | -0.98992500 | -0.99579800 |
| S    | -3.06085700 | 0.18498400  | -1.15393900 |
| H    | -2.16355300 | -2.52709200 | 1.03940900  |
| H    | -4.58289800 | -2.83725800 | 0.09313100  |
| C    | -5.66434800 | -0.84217500 | -1.71194800 |
| H    | -6.18705600 | 0.08061800  | -1.43199600 |
| H    | -5.53892100 | -0.82403000 | -2.80141400 |
| H    | -6.32082100 | -1.68303800 | -1.46762100 |
| Ni   | -0.16619800 | -0.02637800 | 0.16160200  |
| P    | -0.55231400 | 1.13402500  | 1.94041800  |
| C    | -1.69641100 | 0.34549400  | 3.14851200  |
| H    | -1.91209000 | 1.02512700  | 3.97930300  |
| H    | -2.61806900 | 0.06516700  | 2.63630200  |
| H    | -1.23571800 | -0.56488300 | 3.54152500  |
| C    | 0.88312000  | 1.63310300  | 2.98153000  |
| H    | 1.61720800  | 2.14586200  | 2.35312600  |
| H    | 0.56649600  | 2.28482300  | 3.80259000  |
| H    | 1.35045000  | 0.73649900  | 3.39880700  |
| C    | -1.37434900 | 2.73043200  | 1.52759700  |
| H    | -1.62762400 | 3.28963200  | 2.43426100  |
| H    | -0.70111500 | 3.33133100  | 0.91120500  |
| H    | -2.28323800 | 2.52625500  | 0.95639600  |
| C    | 2.56155000  | 3.90176000  | -0.33641300 |
| C    | 2.10780300  | 4.33346000  | -1.58315100 |
| C    | 1.48814500  | 3.39090700  | -2.40550400 |
| C    | 1.36012300  | 2.08036100  | -1.95962500 |
| C    | 1.85970500  | 1.72255300  | -0.68608200 |
| N    | 2.44969400  | 2.64759400  | 0.11131200  |
| H    | 1.10953700  | 3.67271100  | -3.38431000 |
| H    | 3.04687300  | 4.60365100  | 0.34106800  |
| H    | 2.23410200  | 5.36580700  | -1.89209700 |
| H    | 0.87548700  | 1.33955300  | -2.58705500 |

|   |            |             |             |
|---|------------|-------------|-------------|
| C | 1.73216100 | 0.36470400  | -0.13110000 |
| H | 2.39573200 | 0.18577000  | 0.71128600  |
| C | 1.53881700 | -0.80840500 | -1.06352700 |
| H | 0.41313900 | -1.01828900 | -1.22721700 |
| H | 1.84404100 | -0.57329400 | -2.09134900 |
| C | 2.14797700 | -2.11634800 | -0.60087600 |
| C | 3.54209700 | -2.25515800 | -0.54013400 |
| C | 1.34527200 | -3.20434100 | -0.23731800 |
| C | 4.11919000 | -3.45417400 | -0.12385000 |
| H | 4.17579500 | -1.41726500 | -0.81986700 |
| C | 1.92293400 | -4.40579500 | 0.18143300  |
| H | 0.26324900 | -3.10791600 | -0.28322400 |
| C | 3.31053500 | -4.53451600 | 0.23928200  |
| H | 5.20104800 | -3.54606700 | -0.08357200 |
| H | 1.28543900 | -5.24012300 | 0.46049300  |
| H | 3.76043600 | -5.46843900 | 0.56380400  |

18

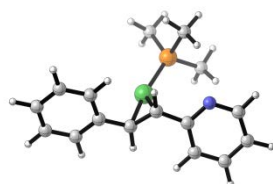

|                              |                     |
|------------------------------|---------------------|
| B3LYP electronic energy:     | -1187.198136 a.u.   |
| B3LYP enthalpy:              | -1186.857773 a.u.   |
| B3LYP free energy:           | -1186.931863 a.u.   |
| M06 SCF energy in solution:  | -1188.48867114 a.u. |
| M06 enthalpy in solution:    | -1188.14830814 a.u. |
| M06 free energy in solution: | -1188.22239814 a.u. |

Cartesian coordinates

| ATOM | X           | Y          | Z           |
|------|-------------|------------|-------------|
| Ni   | -0.15586200 | 0.61117500 | -0.49985100 |
| P    | 1.20546900  | 2.28807800 | -0.15101100 |
| C    | 0.70223000  | 4.04511700 | -0.47137300 |
| H    | 1.48800900  | 4.75168100 | -0.18300800 |
| H    | 0.47894000  | 4.17748400 | -1.53396200 |
| H    | -0.20561400 | 4.27164200 | 0.09458200  |
| C    | 1.72846600  | 2.34673800 | 1.62232200  |
| H    | 2.09078100  | 1.35399000 | 1.90419600  |
| H    | 2.51040800  | 3.09483900 | 1.79308800  |
| H    | 0.86300800  | 2.58380400 | 2.24744600  |
| C    | 2.83940000  | 2.20357900 | -1.02118700 |

|   |             |             |             |
|---|-------------|-------------|-------------|
| H | 3.50850600  | 3.01274400  | -0.70882100 |
| H | 3.30892500  | 1.24241300  | -0.79669600 |
| H | 2.68718600  | 2.26366400  | -2.10249200 |
| C | 3.47203600  | -1.84955900 | 1.10400300  |
| C | 3.85951000  | -2.71517100 | 0.08110100  |
| C | 2.89347800  | -3.07574400 | -0.86104600 |
| C | 1.60898800  | -2.55931100 | -0.74651100 |
| C | 1.30694600  | -1.67534600 | 0.30966300  |
| N | 2.24341600  | -1.33898700 | 1.22914200  |
| H | 3.13667700  | -3.76064500 | -1.66905800 |
| H | 4.18863400  | -1.55266300 | 1.86916900  |
| H | 4.87357300  | -3.09853600 | 0.03378800  |
| H | 0.83897700  | -2.84442700 | -1.45483100 |
| C | -0.02234900 | -1.06898300 | 0.51164000  |
| H | -0.19979600 | -0.80281200 | 1.55251400  |
| C | -1.10418500 | -1.13999600 | -0.39826900 |
| H | -0.96018900 | -1.66457500 | -1.34319500 |
| C | -2.51125800 | -0.84721300 | -0.08002900 |
| C | -3.48417800 | -0.97951000 | -1.09365200 |
| C | -2.95333900 | -0.41246600 | 1.18848500  |
| C | -4.82602700 | -0.69021600 | -0.85749100 |
| H | -3.17284700 | -1.32086000 | -2.07847900 |
| C | -4.29565900 | -0.12579600 | 1.42319700  |
| H | -2.24025700 | -0.30876300 | 2.00023700  |
| C | -5.24280900 | -0.25935300 | 0.40388300  |
| H | -5.54954700 | -0.80641400 | -1.66017200 |
| H | -4.60595400 | 0.20122200  | 2.41225300  |
| H | -6.28874800 | -0.03557900 | 0.59201800  |

19

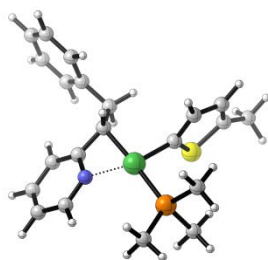

B3LYP electronic energy: -1779.5359338 a.u.  
 B3LYP enthalpy: -1779.091663 a.u.  
 B3LYP free energy: -1779.181634 a.u.  
 M06 SCF energy in solution: -1780.72177107 a.u.  
 M06 enthalpy in solution: -1780.27750007 a.u.  
 M06 free energy in solution: -1780.36747207 a.u.

## Cartesian coordinates

| ATOM | X           | Y           | Z           |
|------|-------------|-------------|-------------|
| C    | -1.29328600 | 1.28457200  | -0.27765500 |
| C    | -1.43261600 | 2.21849000  | -1.28014900 |
| C    | -1.66955000 | 3.56156100  | -0.82895400 |
| C    | -1.71355600 | 3.69128100  | 0.53111900  |
| S    | -1.45605100 | 2.11578200  | 1.26725600  |
| H    | -1.35476600 | 1.96335300  | -2.33353500 |
| H    | -1.79980500 | 4.40572000  | -1.50080600 |
| C    | -1.93626600 | 4.92709700  | 1.35082200  |
| H    | -2.83092500 | 4.85174900  | 1.98140200  |
| H    | -1.09023800 | 5.14008800  | 2.01574800  |
| H    | -2.06648300 | 5.79181900  | 0.69265500  |
| Ni   | -0.90847400 | -0.57168400 | -0.31872500 |
| P    | -3.12608500 | -1.09783500 | -0.36039100 |
| C    | -4.01439900 | -0.31010800 | -1.77376800 |
| H    | -5.09268100 | -0.49158400 | -1.72176000 |
| H    | -3.81449600 | 0.76322700  | -1.75473500 |
| H    | -3.62941800 | -0.71309400 | -2.71513400 |
| C    | -3.64612400 | -2.86966200 | -0.53212700 |
| H    | -3.31405100 | -3.43767800 | 0.34126600  |
| H    | -4.73366200 | -2.96224000 | -0.61795600 |
| H    | -3.18349000 | -3.30333800 | -1.42330800 |
| C    | -4.11848200 | -0.55884800 | 1.10027000  |
| H    | -5.18616000 | -0.74927600 | 0.94992500  |
| H    | -3.78037000 | -1.09911300 | 1.98927700  |
| H    | -3.95219100 | 0.50708200  | 1.26979500  |
| C    | -0.11879100 | -3.59656100 | 0.16553100  |
| C    | 0.79109900  | -4.22624600 | 1.00145000  |
| C    | 1.88864400  | -3.48432800 | 1.46944900  |
| C    | 2.06656200  | -2.17219800 | 1.06081000  |
| C    | 1.15387700  | -1.62201900 | 0.13563500  |
| N    | 0.05064200  | -2.33256400 | -0.25839500 |
| H    | 2.60576400  | -3.94476900 | 2.14379800  |
| H    | -1.01241800 | -4.10631000 | -0.18310000 |
| H    | 0.64475100  | -5.26120500 | 1.29065700  |
| H    | 2.91019100  | -1.58281800 | 1.40018800  |
| C    | 1.07243400  | -0.27881100 | -0.42537300 |
| H    | 1.06742900  | -0.30506300 | -1.52002300 |
| C    | 1.88519100  | 0.86552200  | 0.15504400  |
| H    | 1.47434700  | 1.79735700  | -0.25013400 |
| H    | 1.72894100  | 0.92143900  | 1.23834700  |
| C    | 3.38100500  | 0.81428600  | -0.12919600 |

|   |            |            |             |
|---|------------|------------|-------------|
| C | 3.86744700 | 0.74203400 | -1.44363400 |
| C | 4.31478600 | 0.86171000 | 0.91495100  |
| C | 5.23697700 | 0.71208700 | -1.70385400 |
| H | 3.16448800 | 0.71216500 | -2.27240400 |
| C | 5.68854000 | 0.83046700 | 0.66058300  |
| H | 3.95947400 | 0.93180500 | 1.94102800  |
| C | 6.15537100 | 0.75375700 | -0.65137100 |
| H | 5.58940500 | 0.65847500 | -2.73059600 |
| H | 6.39161000 | 0.86844000 | 1.48855100  |
| H | 7.22241400 | 0.72938000 | -0.85381600 |

20

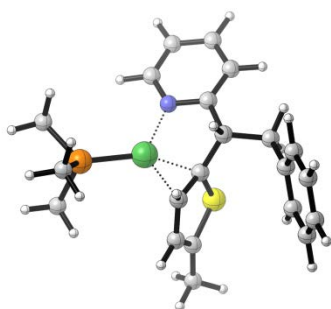

|                              |                     |
|------------------------------|---------------------|
| B3LYP electronic energy:     | -1779.5470847 a.u.  |
| B3LYP enthalpy:              | -1779.102104 a.u.   |
| B3LYP free energy:           | -1779.190685 a.u.   |
| M06 SCF energy in solution:  | -1780.74120629 a.u. |
| M06 enthalpy in solution:    | -1780.29622529 a.u. |
| M06 free energy in solution: | -1780.38480629 a.u. |

Cartesian coordinates

| ATOM | X           | Y           | Z           |
|------|-------------|-------------|-------------|
| C    | -0.47130500 | -0.10839000 | 0.38564500  |
| C    | -0.30850000 | -1.34592400 | -0.31321200 |
| C    | -0.38860200 | -2.49462300 | 0.57191900  |
| C    | -0.55279400 | -2.20553200 | 1.88685700  |
| S    | -0.65094100 | -0.45476700 | 2.15162700  |
| H    | -0.54926300 | -1.44050600 | -1.37009700 |
| H    | -0.31568200 | -3.51753200 | 0.21158500  |
| C    | -0.59519200 | -3.14530100 | 3.05310100  |
| H    | 0.25910000  | -3.00321400 | 3.72737100  |
| H    | -1.50408100 | -3.01647200 | 3.65365500  |
| H    | -0.57163500 | -4.18019500 | 2.69792000  |
| Ni   | 1.38781100  | -0.14944000 | -0.16770800 |
| P    | 3.16731200  | -1.13560800 | -0.95350600 |
| C    | 2.97320500  | -1.94564100 | -2.61488800 |

|   |             |             |             |
|---|-------------|-------------|-------------|
| H | 3.87699200  | -2.48451100 | -2.92096900 |
| H | 2.13285600  | -2.64389100 | -2.57768700 |
| H | 2.74335100  | -1.18421700 | -3.36602300 |
| C | 4.77223400  | -0.22854100 | -1.23472200 |
| H | 5.12610200  | 0.19011300  | -0.28734700 |
| H | 5.55353600  | -0.87943300 | -1.64345800 |
| H | 4.60574700  | 0.60083100  | -1.92903000 |
| C | 3.78015200  | -2.56399000 | 0.06428500  |
| H | 4.62250500  | -3.08089900 | -0.40930300 |
| H | 4.09401800  | -2.20006700 | 1.04701100  |
| H | 2.96061500  | -3.27089000 | 0.21762000  |
| C | 2.31934700  | 2.70173700  | 0.42743200  |
| C | 2.10732800  | 4.04762700  | 0.71472000  |
| C | 0.79714800  | 4.51962900  | 0.73394600  |
| C | -0.24612200 | 3.63328100  | 0.46041400  |
| C | 0.03816400  | 2.29569400  | 0.18318400  |
| N | 1.32086000  | 1.83928400  | 0.17516600  |
| H | 0.58542100  | 5.56084800  | 0.95880600  |
| H | 3.32063500  | 2.28376800  | 0.39985800  |
| H | 2.94964400  | 4.69946500  | 0.92163100  |
| H | -1.27166100 | 3.98282300  | 0.47280400  |
| C | -0.98818000 | 1.21848400  | -0.16583600 |
| H | -0.94161400 | 1.10992000  | -1.26027000 |
| C | -2.45714100 | 1.58065600  | 0.18426800  |
| H | -2.57100500 | 1.61192700  | 1.27321100  |
| H | -2.67103800 | 2.58807800  | -0.19084200 |
| C | -3.46929600 | 0.63029400  | -0.42175600 |
| C | -3.93761800 | -0.48665900 | 0.28286000  |
| C | -3.95402900 | 0.85141300  | -1.71889500 |
| C | -4.86278200 | -1.35794200 | -0.29444700 |
| H | -3.56744100 | -0.67421300 | 1.28643900  |
| C | -4.87725100 | -0.01856200 | -2.30028900 |
| H | -3.60893900 | 1.71976600  | -2.27680000 |
| C | -5.33575500 | -1.12810300 | -1.58758800 |
| H | -5.21483900 | -2.21799400 | 0.26866100  |
| H | -5.24297700 | 0.17396200  | -3.30531900 |
| H | -6.05777300 | -1.80537800 | -2.03517500 |



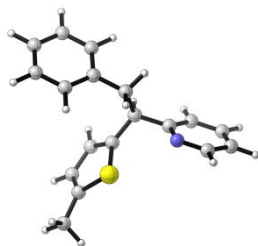

B3LYP electronic energy: -1149.11658054 a.u.  
 B3LYP enthalpy: -1148.796130 a.u.  
 B3LYP free energy: -1148.863089 a.u.  
 M06 SCF energy in solution: -1148.69947558 a.u.  
 M06 enthalpy in solution: -1148.37902558 a.u.  
 M06 free energy in solution: -1148.44598358 a.u.

Cartesian coordinates

| ATOM | X           | Y           | Z           |
|------|-------------|-------------|-------------|
| C    | 0.14737100  | 0.73481500  | 0.54306600  |
| C    | -0.55156100 | 1.32810000  | 1.55920800  |
| C    | -0.72103300 | 2.73720700  | 1.39736300  |
| C    | -0.15436000 | 3.22574600  | 0.25261900  |
| S    | 0.61533800  | 1.93660900  | -0.64885900 |
| H    | -0.94646700 | 0.76694700  | 2.39957200  |
| H    | -1.24542100 | 3.36651600  | 2.10899900  |
| C    | -0.12103500 | 4.64211400  | -0.23880500 |
| H    | 0.90337300  | 5.02088100  | -0.33189500 |
| H    | -0.59806900 | 4.74851900  | -1.21991600 |
| H    | -0.65387200 | 5.28938500  | 0.46355000  |
| C    | 3.75408400  | -0.84422200 | -1.22391900 |
| C    | 4.61002100  | -1.43765100 | -0.29602700 |
| C    | 4.07738300  | -1.82409700 | 0.93248700  |
| C    | 2.72413400  | -1.60167500 | 1.17843100  |
| C    | 1.94256500  | -0.99900200 | 0.18549800  |
| N    | 2.45372500  | -0.63024600 | -0.99907900 |
| H    | 4.70433900  | -2.29000100 | 1.68739700  |
| H    | 4.12933600  | -0.52656400 | -2.19507600 |
| H    | 5.65799700  | -1.58994600 | -0.53283300 |
| H    | 2.27676800  | -1.88658300 | 2.12579200  |
| C    | 0.45612700  | -0.73625200 | 0.39397100  |
| H    | 0.16707600  | -1.19784700 | 1.34572200  |
| C    | -0.37284500 | -1.43279700 | -0.73295500 |
| H    | -0.12524700 | -0.95298200 | -1.68349700 |
| H    | -0.02395100 | -2.46987400 | -0.80360400 |
| C    | -1.86496200 | -1.41804800 | -0.49187500 |
| C    | -2.68268000 | -0.42647600 | -1.04969200 |
| C    | -2.46368700 | -2.39687000 | 0.31391300  |

|   |             |             |             |
|---|-------------|-------------|-------------|
| C | -4.05705300 | -0.41226500 | -0.80848800 |
| H | -2.23653000 | 0.33849600  | -1.67895400 |
| C | -3.83677700 | -2.38616500 | 0.55922900  |
| H | -1.84669900 | -3.18141100 | 0.74695700  |
| C | -4.63910400 | -1.39138900 | -0.00230000 |
| H | -4.67359300 | 0.36407700  | -1.25288400 |
| H | -4.28073800 | -3.15759300 | 1.18239000  |
| H | -5.70932100 | -1.38249800 | 0.18323000  |

22

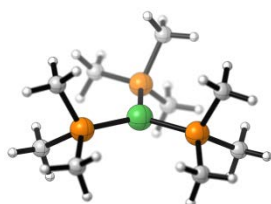

|                              |                     |
|------------------------------|---------------------|
| B3LYP electronic energy:     | -1552.6863131 a.u.  |
| B3LYP enthalpy:              | -1552.318244 a.u.   |
| B3LYP free energy:           | -1552.397028 a.u.   |
| M06 SCF energy in solution:  | -1554.10675451 a.u. |
| M06 enthalpy in solution:    | -1553.73868551 a.u. |
| M06 free energy in solution: | -1553.81746951 a.u. |

Cartesian coordinates

| ATOM | X           | Y           | Z           |
|------|-------------|-------------|-------------|
| Ni   | -0.01852500 | -0.03348700 | -0.08264100 |
| P    | 1.71141500  | -1.36558700 | -0.02761600 |
| C    | 3.25348400  | -0.93458800 | -0.98728300 |
| H    | 4.05210700  | -1.67351900 | -0.85033300 |
| H    | 3.01147400  | -0.87111600 | -2.05250500 |
| H    | 3.61843100  | 0.04622400  | -0.66889100 |
| C    | 2.45089600  | -1.59285500 | 1.66750300  |
| H    | 1.69729200  | -2.00882900 | 2.34224400  |
| H    | 3.31972200  | -2.26089400 | 1.64978800  |
| H    | 2.75562100  | -0.62057900 | 2.06443700  |
| C    | 1.56373300  | -3.15494900 | -0.53896900 |
| H    | 2.50380500  | -3.70762300 | -0.42075000 |
| H    | 0.78734600  | -3.63777100 | 0.06118900  |
| H    | 1.25356600  | -3.20569400 | -1.58712900 |
| P    | -2.06967900 | -0.78362800 | -0.02418100 |
| C    | -2.92648200 | -0.59709200 | 1.62006700  |
| H    | -3.95640100 | -0.97165000 | 1.59430600  |
| H    | -2.36944300 | -1.14568800 | 2.38517300  |
| H    | -2.93799500 | 0.45836400  | 1.90563400  |

|   |             |             |             |
|---|-------------|-------------|-------------|
| C | -3.33398900 | 0.01521400  | -1.13805200 |
| H | -3.02633600 | -0.10823300 | -2.18079200 |
| H | -4.33474100 | -0.41449000 | -1.01111300 |
| H | -3.37444300 | 1.08705400  | -0.92593200 |
| C | -2.47677500 | -2.57232900 | -0.37163100 |
| H | -3.54985500 | -2.78515100 | -0.29331100 |
| H | -2.13700500 | -2.83066900 | -1.37900500 |
| H | -1.93605100 | -3.20784600 | 0.33580900  |
| P | 0.33754900  | 2.12058800  | -0.01979400 |
| C | -1.06529700 | 3.34989500  | -0.13475800 |
| H | -0.72337000 | 4.38994900  | -0.06781200 |
| H | -1.58960800 | 3.21112700  | -1.08514700 |
| H | -1.77892700 | 3.15936600  | 0.67257800  |
| C | 1.15326000  | 2.75741500  | 1.53074400  |
| H | 2.12363500  | 2.26884900  | 1.65684000  |
| H | 1.30056300  | 3.84348300  | 1.50445500  |
| H | 0.53609500  | 2.50538500  | 2.39804300  |
| C | 1.46437100  | 2.86771700  | -1.30397300 |
| H | 1.59670400  | 3.94681500  | -1.16217800 |
| H | 2.44086900  | 2.37826700  | -1.25976600 |
| H | 1.04716600  | 2.69135500  | -2.29991300 |

ts1

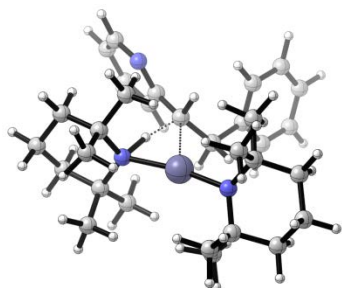

B3LYP electronic energy: -1440.6601618 a.u.  
 B3LYP enthalpy: -1439.880142 a.u.  
 B3LYP free energy: -1439.989280 a.u.  
 M06 SCF energy in solution: -1601.56480782 a.u.  
 M06 enthalpy in solution: -1600.78478882 a.u.  
 M06 free energy in solution: -1600.89392582 a.u.

Cartesian coordinates

| ATOM | X           | Y           | Z           |
|------|-------------|-------------|-------------|
| C    | 1.37406000  | 0.55120600  | -0.27003500 |
| Zn   | -1.13772800 | -0.59321100 | -0.01017900 |
| H    | 0.99462100  | 0.78246100  | -1.27188300 |
| N    | 0.31396500  | -2.01376100 | 0.16541800  |

|   |             |             |             |
|---|-------------|-------------|-------------|
| C | 1.94583500  | -3.40302300 | 1.45086700  |
| C | 0.62414200  | -2.59790300 | 1.51624300  |
| C | 0.38260600  | -2.92847900 | -1.03323700 |
| C | 1.70776200  | -3.72757000 | -1.01966200 |
| C | 1.97564200  | -4.42739300 | 0.31447100  |
| H | 2.77173900  | -2.69507600 | 1.30757400  |
| H | 2.10868900  | -3.89087400 | 2.41988400  |
| H | 1.68887900  | -4.45304600 | -1.84211000 |
| H | 2.52670400  | -3.02946800 | -1.22680500 |
| H | 1.24201000  | -5.22417700 | 0.49029200  |
| H | 2.95482100  | -4.91924500 | 0.28573500  |
| C | -0.51402200 | -3.47885500 | 2.08082800  |
| H | -0.33624800 | -3.67492300 | 3.14376900  |
| H | -1.48347900 | -2.97700900 | 1.99379000  |
| H | -0.59747400 | -4.44669900 | 1.58603700  |
| C | 0.36670200  | -2.05557300 | -2.30250500 |
| H | 0.42294300  | -2.69911700 | -3.18639400 |
| H | -0.57562600 | -1.49460100 | -2.39722900 |
| H | 1.20917600  | -1.35970800 | -2.32797300 |
| C | 0.83395100  | -1.43065500 | 2.49955900  |
| H | -0.06052200 | -0.80231700 | 2.59239000  |
| H | 1.05206600  | -1.82389800 | 3.49733200  |
| H | 1.66984100  | -0.79873700 | 2.19505000  |
| C | -0.83017600 | -3.88345200 | -1.12119400 |
| H | -1.77184400 | -3.32820500 | -1.03340800 |
| H | -0.83374300 | -4.38458300 | -2.09517200 |
| H | -0.83000600 | -4.66077900 | -0.35717200 |
| C | 4.51125300  | -0.66059900 | -1.68819200 |
| C | 5.48665700  | -0.46347900 | -0.71201500 |
| C | 5.08028200  | 0.13492000  | 0.48310200  |
| C | 3.74997700  | 0.50092900  | 0.64680300  |
| C | 2.81789600  | 0.26169100  | -0.39191800 |
| N | 3.22589800  | -0.32141900 | -1.54956800 |
| H | 5.79811900  | 0.32665500  | 1.27694200  |
| H | 4.77854300  | -1.11586900 | -2.64226300 |
| H | 6.51679700  | -0.75648300 | -0.88611200 |
| H | 3.43389400  | 0.99700600  | 1.55794400  |
| C | 0.97718600  | 1.64815200  | 0.72892400  |
| H | -0.11896400 | 1.76653000  | 0.71163700  |
| H | 1.19865100  | 1.33805700  | 1.75881900  |
| C | 1.56633500  | 3.04627900  | 0.53524100  |
| C | 2.00218200  | 3.50950600  | -0.71265200 |
| C | 1.63719200  | 3.92561900  | 1.62624100  |
| C | 2.48886600  | 4.80974900  | -0.86569500 |

|   |             |             |             |
|---|-------------|-------------|-------------|
| H | 1.97557600  | 2.84252700  | -1.56864600 |
| C | 2.12218200  | 5.22513000  | 1.47923700  |
| H | 1.30789800  | 3.58369000  | 2.60585000  |
| C | 2.55048600  | 5.67390500  | 0.22802300  |
| H | 2.82577200  | 5.14504300  | -1.84312400 |
| H | 2.17018900  | 5.88538700  | 2.34135900  |
| H | 2.93255900  | 6.68397300  | 0.10898300  |
| H | 0.95008800  | -0.91049000 | -0.00396900 |
| N | -2.75665500 | 0.44389700  | -0.10103600 |
| C | -4.05328100 | 2.29560200  | -1.14541300 |
| C | -3.15061900 | 1.05776600  | -1.38910000 |
| C | -3.76758900 | 0.22131400  | 0.95497300  |
| C | -4.65285500 | 1.48200800  | 1.13575600  |
| C | -5.20918800 | 2.01209900  | -0.18594800 |
| H | -3.43217800 | 3.09277200  | -0.71660900 |
| H | -4.42757700 | 2.66429600  | -2.10856000 |
| H | -5.46432400 | 1.25700300  | 1.83933600  |
| H | -4.03914400 | 2.26834400  | 1.59469500  |
| H | -5.91069900 | 1.29218900  | -0.62618600 |
| H | -5.78523100 | 2.92854400  | -0.01005700 |
| C | -3.85703200 | 0.07647200  | -2.36369900 |
| H | -3.99936100 | 0.53714200  | -3.34855000 |
| H | -3.24953400 | -0.82575200 | -2.49901800 |
| H | -4.83927700 | -0.23994500 | -2.00717700 |
| C | -3.01870500 | -0.00502600 | 2.28147700  |
| H | -3.71547300 | -0.10960000 | 3.11985200  |
| H | -2.43060900 | -0.93395100 | 2.25549800  |
| H | -2.34538700 | 0.83148900  | 2.49366700  |
| C | -1.87239800 | 1.55199900  | -2.08940800 |
| H | -1.20612200 | 0.71852700  | -2.35222100 |
| H | -2.11137800 | 2.06136100  | -3.02889400 |
| H | -1.32015400 | 2.24839600  | -1.45237400 |
| C | -4.66428900 | -1.02479900 | 0.72166500  |
| H | -4.04144200 | -1.91082900 | 0.55109500  |
| H | -5.30042000 | -1.22198400 | 1.59305800  |
| H | -5.32020800 | -0.91393500 | -0.14343900 |

ts2

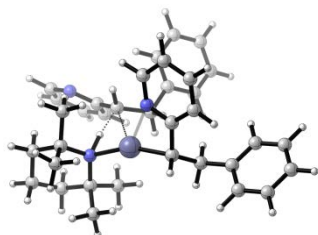

B3LYP electronic energy: -1589.4595395 a.u.  
 B3LYP enthalpy: -1588.722629 a.u.  
 B3LYP free energy: -1588.838222 a.u.  
 M06 SCF energy in solution: -1750.27989869 a.u.  
 M06 enthalpy in solution: -1749.54298769 a.u.  
 M06 free energy in solution: -1749.65858069 a.u.

Cartesian coordinates

| ATOM | X           | Y           | Z           |
|------|-------------|-------------|-------------|
| C    | -1.69976100 | 0.95513800  | 0.21763400  |
| Zn   | 0.31340300  | -1.34136700 | 0.13563200  |
| H    | -1.49079500 | 0.93917000  | 1.29179300  |
| N    | -1.65353200 | -1.82746300 | -0.16277200 |
| C    | -3.47521100 | -2.44595900 | -1.77324500 |
| C    | -1.95225500 | -2.25608100 | -1.57703800 |
| C    | -2.31290900 | -2.58360700 | 0.96627000  |
| C    | -3.82057400 | -2.78179300 | 0.67932800  |
| C    | -4.10891100 | -3.34761600 | -0.71224600 |
| H    | -3.95328600 | -1.45962300 | -1.72735400 |
| H    | -3.65527900 | -2.84097500 | -2.78080800 |
| H    | -4.24318200 | -3.42858400 | 1.45807900  |
| H    | -4.31064800 | -1.80582800 | 0.77204300  |
| H    | -3.73610000 | -4.37564900 | -0.80395500 |
| H    | -5.19188000 | -3.40328200 | -0.87272900 |
| C    | -1.18927800 | -3.53594800 | -1.99082200 |
| H    | -1.28876000 | -3.69291500 | -3.07049200 |
| H    | -0.11904400 | -3.44298200 | -1.76959500 |
| H    | -1.55290800 | -4.43843900 | -1.49864700 |
| C    | -2.18770300 | -1.74058100 | 2.25044100  |
| H    | -2.63264800 | -2.29204800 | 3.08556800  |
| H    | -1.13795300 | -1.55552700 | 2.51103900  |
| H    | -2.70787600 | -0.78495600 | 2.15072500  |
| C    | -1.48787900 | -1.12946100 | -2.52088300 |
| H    | -0.40839500 | -0.94172700 | -2.43760300 |
| H    | -1.67925800 | -1.41815000 | -3.55921500 |
| H    | -2.01741500 | -0.19641900 | -2.32279400 |
| C    | -1.62617900 | -3.94177700 | 1.23747100  |
| H    | -0.54432700 | -3.81449400 | 1.37399100  |

|   |             |             |             |
|---|-------------|-------------|-------------|
| H | -2.02047900 | -4.37680700 | 2.16221800  |
| H | -1.77526600 | -4.67566200 | 0.44488600  |
| C | -5.29028200 | 1.20877500  | 0.74740500  |
| C | -5.81363300 | 1.83204300  | -0.38512700 |
| C | -4.90268500 | 2.22402500  | -1.37101000 |
| C | -3.54832000 | 1.98217500  | -1.18807600 |
| C | -3.09308700 | 1.33229100  | -0.00947400 |
| N | -3.99368600 | 0.95769100  | 0.94527100  |
| H | -5.24703100 | 2.72874300  | -2.27091800 |
| H | -5.95824100 | 0.89293500  | 1.55030900  |
| H | -6.87949000 | 2.01058500  | -0.48258100 |
| H | -2.83389700 | 2.31557500  | -1.93348200 |
| C | -0.61763500 | 1.71436400  | -0.54917600 |
| H | 0.36676500  | 1.28889800  | -0.28284700 |
| H | -0.70252200 | 1.54408000  | -1.63168300 |
| C | -0.48899600 | 3.22581300  | -0.33771400 |
| C | -0.96664100 | 3.86003300  | 0.81563700  |
| C | 0.16508100  | 4.01072500  | -1.29931000 |
| C | -0.79033400 | 5.23256100  | 1.00504700  |
| H | -1.49407200 | 3.27405900  | 1.56186400  |
| C | 0.34430500  | 5.38198600  | -1.11571400 |
| H | 0.53599300  | 3.53786600  | -2.20729900 |
| C | -0.13300800 | 5.99981400  | 0.04234300  |
| H | -1.17429700 | 5.70425100  | 1.90601500  |
| H | 0.85071100  | 5.96872500  | -1.87799900 |
| H | 0.00009400  | 7.06825100  | 0.18854000  |
| H | -1.81489500 | -0.60132200 | -0.05071200 |
| C | 2.38828000  | -1.30351600 | -0.10161700 |
| H | 2.82484800  | -2.30791300 | -0.18424000 |
| C | 1.45052800  | -0.08366400 | 3.22437600  |
| C | 2.63343100  | 0.18100100  | 3.90457200  |
| C | 3.84057700  | -0.06157400 | 3.24479900  |
| C | 3.82786300  | -0.54681600 | 1.93939700  |
| C | 2.59926200  | -0.78147800 | 1.30237300  |
| N | 1.43706100  | -0.55122600 | 1.96644100  |
| H | 4.78588100  | 0.12488800  | 3.74696200  |
| H | 0.48028200  | 0.07849100  | 3.68601000  |
| H | 2.60826200  | 0.56186200  | 4.91985300  |
| H | 4.75243200  | -0.74212000 | 1.41012100  |
| C | 2.96511100  | -0.42319200 | -1.24076900 |
| H | 2.61715800  | -0.85001800 | -2.19047300 |
| H | 2.53539300  | 0.58410900  | -1.18584200 |
| C | 4.47933300  | -0.30411900 | -1.29381700 |
| C | 5.27485400  | -1.41118700 | -1.62861000 |

|   |            |             |             |
|---|------------|-------------|-------------|
| C | 5.12135400 | 0.90768600  | -1.00552600 |
| C | 6.66542400 | -1.31262800 | -1.66649300 |
| H | 4.79726900 | -2.35956400 | -1.86543800 |
| C | 6.51421300 | 1.01249800  | -1.04272900 |
| H | 4.52258800 | 1.77893000  | -0.75074100 |
| C | 7.29157500 | -0.09834500 | -1.37139600 |
| H | 7.26164100 | -2.18146700 | -1.93213500 |
| H | 6.98964700 | 1.96317700  | -0.81697900 |
| H | 8.37452100 | -0.01965500 | -1.40279100 |

ts3

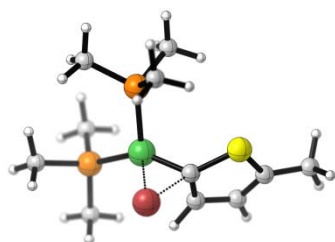

|                              |                     |
|------------------------------|---------------------|
| B3LYP electronic energy:     | -1696.44805186 a.u. |
| B3LYP enthalpy:              | -1696.108171 a.u.   |
| B3LYP free energy:           | -1696.191760 a.u.   |
| M06 SCF energy in solution:  | -1698.03532154 a.u. |
| M06 enthalpy in solution:    | -1697.69543454 a.u. |
| M06 free energy in solution: | -1697.77902454 a.u. |

Cartesian coordinates

| ATOM | X           | Y           | Z           |
|------|-------------|-------------|-------------|
| C    | 1.34573700  | -0.34869000 | 0.29974900  |
| C    | 1.32870700  | -1.69333900 | -0.09398300 |
| C    | 2.42774200  | -2.01497400 | -0.97040800 |
| C    | 3.32074700  | -1.00249100 | -1.15339200 |
| S    | 2.80553100  | 0.45507200  | -0.28549600 |
| H    | 0.73925400  | -2.44855600 | 0.40889600  |
| H    | 2.57793700  | -3.00336600 | -1.39518600 |
| Ni   | -0.44359800 | -0.16974800 | -0.10835900 |
| Br   | 0.65111400  | -0.09079100 | 2.49675800  |
| P    | -2.41770500 | -1.23391800 | -0.45097600 |
| C    | -2.39356000 | -3.06705300 | -0.17344400 |
| H    | -3.38103100 | -3.51579600 | -0.32681000 |
| H    | -1.67867100 | -3.52916500 | -0.85956400 |
| H    | -2.06362700 | -3.27142600 | 0.84901000  |
| C    | -3.84161400 | -0.73751600 | 0.62606500  |
| H    | -4.07325300 | 0.31916700  | 0.46877200  |
| H    | -4.73594000 | -1.33508000 | 0.41970200  |



|   |             |             |             |
|---|-------------|-------------|-------------|
| H | -3.55796900 | -0.86711200 | 1.67419800  |
| C | -3.17341100 | -1.13980200 | -2.14143000 |
| H | -4.10654200 | -1.70982700 | -2.20469100 |
| H | -3.37863600 | -0.09630700 | -2.39668600 |
| H | -2.46547100 | -1.53238000 | -2.87677000 |
| P | -0.65714800 | 2.04422600  | -0.51157900 |
| C | 0.37372300  | 3.20573400  | 0.49389800  |
| H | 0.17930200  | 4.25006900  | 0.22734100  |
| H | 0.16356500  | 3.04816600  | 1.55424400  |
| H | 1.43142200  | 2.98754500  | 0.32792900  |
| C | -0.18769200 | 2.52889900  | -2.23865300 |
| H | -0.83953700 | 2.01799400  | -2.95322000 |
| H | -0.26076400 | 3.61040400  | -2.39782300 |
| H | 0.83970800  | 2.20526500  | -2.42590800 |
| C | -2.32793400 | 2.83994100  | -0.35392700 |
| H | -2.30320000 | 3.90091100  | -0.62558100 |
| H | -3.04738200 | 2.32927700  | -1.00108200 |
| H | -2.67415000 | 2.74853500  | 0.67957200  |
| C | 4.58478000  | -1.00171300 | -1.95731500 |
| H | 4.75281900  | -1.99642300 | -2.38116900 |
| H | 4.54722000  | -0.28704800 | -2.78871900 |
| H | 5.45763100  | -0.74398600 | -1.34562300 |

ts4

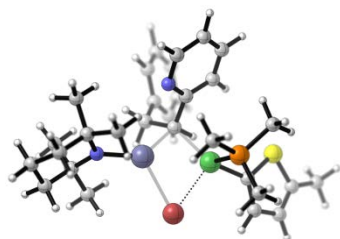

B3LYP electronic energy: -2266.8882194 a.u.  
 B3LYP enthalpy: -2266.167818 a.u.  
 B3LYP free energy: -2266.295478 a.u.  
 M06 SCF energy in solution: -2429.6707073 a.u.  
 M06 enthalpy in solution: -2428.9503063 a.u.  
 M06 free energy in solution: -2429.0779663 a.u.

Cartesian coordinates

| ATOM | X           | Y           | Z           |
|------|-------------|-------------|-------------|
| Ni   | 1.36397800  | -0.82612800 | -0.09829700 |
| Br   | -0.28329300 | -2.64248200 | -1.33690500 |
| P    | 1.84516700  | -2.04452200 | 1.64878600  |
| C    | 3.07873900  | -1.40116300 | 2.85341700  |

|    |             |             |             |
|----|-------------|-------------|-------------|
| H  | 3.16882300  | -2.08368200 | 3.70456000  |
| H  | 4.04869000  | -1.29524300 | 2.36412900  |
| H  | 2.75947500  | -0.41868700 | 3.20922800  |
| C  | 0.34061800  | -2.31396400 | 2.67764100  |
| H  | -0.41307700 | -2.83039700 | 2.07965800  |
| H  | 0.58907900  | -2.92500600 | 3.55196800  |
| H  | -0.06570700 | -1.35582800 | 3.00808000  |
| C  | 2.40864900  | -3.74930000 | 1.26558300  |
| H  | 2.46472400  | -4.34500100 | 2.18195700  |
| H  | 1.69444800  | -4.19946400 | 0.57227500  |
| H  | 3.38686600  | -3.71172100 | 0.78407300  |
| C  | 0.16165700  | 1.05891200  | -0.04808800 |
| Zn | -1.46877400 | -0.48099800 | -0.29643000 |
| H  | 1.14460700  | 1.08014200  | -0.57436400 |
| C  | -0.58541000 | 1.68310500  | 3.48025800  |
| C  | 0.54898700  | 2.29263900  | 4.01373600  |
| C  | 1.63465700  | 2.50512800  | 3.16079300  |
| C  | 1.53901400  | 2.10879500  | 1.82976800  |
| C  | 0.35908100  | 1.48867900  | 1.37420900  |
| N  | -0.68244800 | 1.27980900  | 2.20649800  |
| H  | 2.53750000  | 2.98912800  | 3.52355800  |
| H  | -1.45920800 | 1.49865900  | 4.10307000  |
| H  | 0.57684700  | 2.59165700  | 5.05643900  |
| H  | 2.35539000  | 2.28676900  | 1.13749800  |
| C  | 3.10522400  | -1.13455900 | -0.64415400 |
| C  | 3.51589000  | -2.00290600 | -1.62804800 |
| S  | 4.39832600  | -0.00385700 | -0.26800100 |
| C  | 4.83695400  | -1.73501600 | -2.10897900 |
| H  | 2.88049000  | -2.79273200 | -2.01290600 |
| C  | 5.46170600  | -0.68810300 | -1.48299000 |
| H  | 5.30797000  | -2.30198300 | -2.90625800 |
| C  | 6.82411700  | -0.12018800 | -1.74718500 |
| H  | 7.32952900  | -0.71554100 | -2.51312900 |
| H  | 6.77455300  | 0.91411200  | -2.10729500 |
| H  | 7.45322300  | -0.12380100 | -0.84962900 |
| C  | -0.68398600 | 2.11377700  | -0.85116600 |
| H  | -0.87889600 | 1.72602300  | -1.85844600 |
| H  | -1.65631700 | 2.24499100  | -0.36664800 |
| C  | 0.00626100  | 3.45883600  | -0.97970400 |
| C  | 0.99216100  | 3.66325100  | -1.95662500 |
| C  | -0.30860100 | 4.51886300  | -0.11883000 |
| C  | 1.64659200  | 4.89011200  | -2.06913100 |
| H  | 1.24158100  | 2.85565500  | -2.64191700 |
| C  | 0.34343400  | 5.74867800  | -0.22873600 |

|   |             |             |             |
|---|-------------|-------------|-------------|
| H | -1.07585900 | 4.37966600  | 0.63850500  |
| C | 1.32408000  | 5.93810800  | -1.20351100 |
| H | 2.40143500  | 5.03079900  | -2.83791100 |
| H | 0.08105600  | 6.55976400  | 0.44505800  |
| H | 1.82900000  | 6.89577200  | -1.29287000 |
| N | -3.41333700 | -0.39985400 | -0.33495700 |
| C | -5.42709200 | -1.44057300 | 0.71291300  |
| C | -4.16524100 | -0.56125200 | 0.92203700  |
| C | -4.13025100 | -0.09608600 | -1.58698300 |
| C | -5.38204900 | -1.00085500 | -1.74345200 |
| C | -6.26216300 | -1.00857100 | -0.49285700 |
| H | -5.09810400 | -2.47601600 | 0.55108200  |
| H | -6.03312900 | -1.43589400 | 1.62877100  |
| H | -5.95862300 | -0.68264700 | -2.62203200 |
| H | -5.04023300 | -2.02632600 | -1.93684200 |
| H | -6.69946200 | -0.01608900 | -0.32343800 |
| H | -7.10850800 | -1.69331500 | -0.63008400 |
| C | -4.56194200 | 0.78585400  | 1.59041800  |
| H | -4.99607400 | 0.62071600  | 2.58516500  |
| H | -3.67427700 | 1.41590700  | 1.70370200  |
| H | -5.29739400 | 1.34190700  | 1.00540700  |
| C | -3.19214500 | -0.40635500 | -2.76781700 |
| H | -3.69174000 | -0.22756300 | -3.72618900 |
| H | -2.30637500 | 0.24585000  | -2.75502700 |
| H | -2.85407400 | -1.44581800 | -2.74068200 |
| C | -3.25318000 | -1.29795900 | 1.92179300  |
| H | -2.37380200 | -0.68526500 | 2.16035500  |
| H | -3.77163400 | -1.49277200 | 2.86775500  |
| H | -2.93291800 | -2.26091600 | 1.50719400  |
| C | -4.55346700 | 1.39434300  | -1.72495600 |
| H | -3.68952300 | 2.04940300  | -1.57669300 |
| H | -4.96281400 | 1.59514200  | -2.72300600 |
| H | -5.31448500 | 1.68452800  | -0.99790700 |

ts5

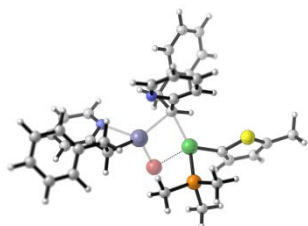

B3LYP electronic energy: -2415.6891079 a.u.  
 B3LYP enthalpy: -2415.011700 a.u.

B3LYP free energy: -2415.145150 a.u.  
 M06 SCF energy in solution: -2578.3875286 a.u.  
 M06 enthalpy in solution: -2577.7101206 a.u.  
 M06 free energy in solution: -2577.8435706 a.u.

Cartesian coordinates

| ATOM | X           | Y           | Z           |
|------|-------------|-------------|-------------|
| Ni   | 1.64735900  | -0.92362600 | -0.12099500 |
| Br   | 0.31239400  | -1.27155200 | -2.62858000 |
| P    | 1.27022700  | -2.99682100 | 0.43669800  |
| C    | 1.90703000  | -3.53041500 | 2.08048200  |
| H    | 1.60656700  | -4.56291800 | 2.28526600  |
| H    | 2.99504200  | -3.45248900 | 2.10223900  |
| H    | 1.49767900  | -2.87801900 | 2.85633300  |
| C    | -0.53184900 | -3.37279700 | 0.56119500  |
| H    | -0.99950300 | -3.20031500 | -0.40964900 |
| H    | -0.66875200 | -4.41818300 | 0.85827700  |
| H    | -1.00830800 | -2.72364900 | 1.29938700  |
| C    | 1.87300400  | -4.26884500 | -0.74137300 |
| H    | 1.52619200  | -5.26045800 | -0.43459900 |
| H    | 1.47979300  | -4.02645200 | -1.73141500 |
| H    | 2.96275300  | -4.24957300 | -0.77805400 |
| C    | 0.90167600  | 1.06386800  | 0.20252800  |
| Zn   | -0.96383100 | -0.02851700 | -0.53019200 |
| H    | 2.00725000  | 0.87817800  | 0.10110300  |
| C    | -1.03113400 | 1.88431100  | 3.18095900  |
| C    | -0.11770000 | 1.95949100  | 4.23149900  |
| C    | 1.22853600  | 1.73050500  | 3.94025700  |
| C    | 1.60132600  | 1.44579100  | 2.63009000  |
| C    | 0.61223800  | 1.38251600  | 1.63128400  |
| N    | -0.68948400 | 1.59811800  | 1.91930000  |
| H    | 1.98074500  | 1.78492600  | 4.72274400  |
| H    | -2.09203100 | 2.05011800  | 3.36070700  |
| H    | -0.45217600 | 2.18722500  | 5.23825100  |
| H    | 2.64245100  | 1.28166200  | 2.37051200  |
| C    | 3.44283400  | -1.41406700 | -0.11838000 |
| C    | 4.18251800  | -1.70462000 | -1.23950800 |
| S    | 4.51312600  | -1.10823600 | 1.23983200  |
| C    | 5.59742500  | -1.64933400 | -1.02104900 |
| H    | 3.72786700  | -1.93033400 | -2.19822000 |
| C    | 5.95421100  | -1.34406800 | 0.26535500  |
| H    | 6.32971800  | -1.83028500 | -1.80210200 |
| C    | 7.32937100  | -1.19220800 | 0.84380100  |
| H    | 8.07821400  | -1.39920500 | 0.07369700  |

|   |             |             |             |
|---|-------------|-------------|-------------|
| H | 7.50763500  | -0.17746500 | 1.21831500  |
| H | 7.50506700  | -1.88316600 | 1.67652200  |
| C | 0.65160400  | 2.26171300  | -0.76891800 |
| H | 0.70680200  | 1.89217700  | -1.79910400 |
| H | -0.36128100 | 2.64547200  | -0.61137700 |
| C | 1.65215500  | 3.38720200  | -0.58380500 |
| C | 2.87612500  | 3.36993600  | -1.26896500 |
| C | 1.39351900  | 4.45150700  | 0.29169300  |
| C | 3.81704000  | 4.38348500  | -1.08182100 |
| H | 3.08760600  | 2.55842500  | -1.96188000 |
| C | 2.33211100  | 5.46743200  | 0.48061200  |
| H | 0.44692600  | 4.48431800  | 0.82502200  |
| C | 3.54817600  | 5.43614500  | -0.20428200 |
| H | 4.75644500  | 4.35477200  | -1.62726400 |
| H | 2.11111700  | 6.28597900  | 1.16045900  |
| H | 4.27783400  | 6.22803500  | -0.06001200 |
| C | -2.95538800 | -0.63615000 | -0.22407600 |
| H | -3.18827700 | -1.66195100 | -0.53730800 |
| C | -2.84623100 | 2.15164300  | -2.59556300 |
| C | -4.09731000 | 2.21369500  | -3.19988500 |
| C | -5.06148900 | 1.28086300  | -2.81131800 |
| C | -4.74927000 | 0.33690900  | -1.83650300 |
| C | -3.46734400 | 0.33136500  | -1.26228500 |
| N | -2.54113900 | 1.23914200  | -1.66219200 |
| H | -6.04802900 | 1.28962000  | -3.26712800 |
| H | -2.05118100 | 2.83988700  | -2.87123000 |
| H | -4.30340600 | 2.96040700  | -3.95945100 |
| H | -5.48201700 | -0.39429300 | -1.51539100 |
| C | -3.53803200 | -0.40717500 | 1.19537000  |
| H | -3.01644700 | -1.08460600 | 1.88489400  |
| H | -3.29376400 | 0.60739700  | 1.52746900  |
| C | -5.03311400 | -0.63379200 | 1.33716700  |
| C | -5.56887400 | -1.93130300 | 1.31625700  |
| C | -5.92200900 | 0.44119000  | 1.47502800  |
| C | -6.94228800 | -2.14776500 | 1.42519000  |
| H | -4.89737400 | -2.78133200 | 1.21404900  |
| C | -7.29901100 | 0.23169700  | 1.58450400  |
| H | -5.52824800 | 1.45471700  | 1.49751500  |
| C | -7.81511000 | -1.06428700 | 1.55935000  |
| H | -7.33275800 | -3.16200600 | 1.41053700  |
| H | -7.96745200 | 1.08203600  | 1.69147900  |
| H | -8.88514800 | -1.23058900 | 1.64641500  |

ts6

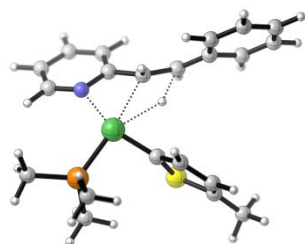

B3LYP electronic energy: -1779.4382976 a.u.  
B3LYP enthalpy: -1778.999777 a.u.  
B3LYP free energy: -1779.090543 a.u.  
M06 SCF energy in solution: -1780.62369499 a.u.  
M06 enthalpy in solution: -1780.18517399 a.u.  
M06 free energy in solution: -1780.27593999 a.u.

Cartesian coordinates

| ATOM | X           | Y           | Z           |
|------|-------------|-------------|-------------|
| C    | 0.17996900  | 1.43381200  | 0.13313700  |
| C    | -0.47646500 | 2.24754100  | 1.03393900  |
| C    | -1.18196000 | 3.35459500  | 0.45773300  |
| C    | -1.09121200 | 3.42187200  | -0.90560000 |
| S    | -0.10588600 | 2.08938400  | -1.48292700 |
| H    | -0.47275900 | 2.05580800  | 2.10353400  |
| H    | -1.74988200 | 4.07402300  | 1.04108900  |
| C    | -1.70788900 | 4.42261800  | -1.83691200 |
| H    | -0.95495900 | 4.95882300  | -2.42746000 |
| H    | -2.40043200 | 3.95254600  | -2.54562300 |
| H    | -2.27239500 | 5.16502400  | -1.26451200 |
| Ni   | 1.17362000  | -0.19874300 | 0.32066000  |
| P    | 3.14313000  | 0.88321100  | 0.59500400  |
| C    | 3.07907800  | 2.00371200  | 2.06151800  |
| H    | 3.98642300  | 2.61085900  | 2.14441200  |
| H    | 2.20536100  | 2.65160300  | 1.96466500  |
| H    | 2.96464900  | 1.40696100  | 2.97116800  |
| C    | 4.73838800  | -0.02053800 | 0.89172300  |
| H    | 4.98574100  | -0.63283600 | 0.02000000  |
| H    | 5.56403200  | 0.67540000  | 1.07555200  |
| H    | 4.63572800  | -0.67859300 | 1.75958200  |
| C    | 3.62009100  | 2.02622400  | -0.77479800 |
| H    | 4.50151700  | 2.62035700  | -0.51164800 |
| H    | 3.83704200  | 1.44446300  | -1.67529400 |
| H    | 2.77958400  | 2.68721500  | -0.99583500 |
| C    | 2.63621800  | -2.86240800 | -0.02872700 |
| C    | 2.57721600  | -3.92349200 | -0.91590900 |
| C    | 1.35234100  | -4.19975000 | -1.55636200 |

|   |             |             |             |
|---|-------------|-------------|-------------|
| C | 0.24010700  | -3.43119600 | -1.26296600 |
| C | 0.35029100  | -2.42818000 | -0.27851400 |
| N | 1.55823300  | -2.12111900 | 0.29984200  |
| H | 1.28040700  | -5.01847800 | -2.26647200 |
| H | 3.56838400  | -2.57824000 | 0.44918100  |
| H | 3.46278900  | -4.51665200 | -1.11569300 |
| H | -0.71970500 | -3.61070000 | -1.73353000 |
| C | -0.73955200 | -1.57448800 | 0.19520500  |
| H | -0.79582200 | -1.50091200 | 1.27939600  |
| C | -1.99736100 | -1.37348500 | -0.54170400 |
| H | -0.92218000 | -0.43090400 | -0.23627100 |
| H | -1.92539600 | -1.36813300 | -1.62530600 |
| C | -3.28427800 | -1.11541100 | 0.05393400  |
| C | -4.37107300 | -0.73785900 | -0.77496100 |
| C | -3.54409500 | -1.23432200 | 1.44156600  |
| C | -5.63320700 | -0.49451500 | -0.24969300 |
| H | -4.20273200 | -0.63605300 | -1.84442500 |
| C | -4.80791600 | -0.97247000 | 1.96228000  |
| H | -2.75243800 | -1.54814800 | 2.11557100  |
| C | -5.86501100 | -0.60256500 | 1.12654300  |
| H | -6.44360700 | -0.21004800 | -0.91611700 |
| H | -4.97243100 | -1.07087800 | 3.03242800  |
| H | -6.85078400 | -0.40635600 | 1.53739700  |

ts7

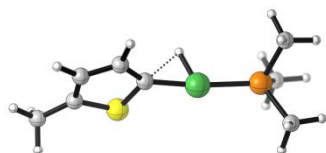

|                              |                     |
|------------------------------|---------------------|
| B3LYP electronic energy:     | -1222.7270883 a.u.  |
| B3LYP enthalpy:              | -1222.505834 a.u.   |
| B3LYP free energy:           | -1222.568212 a.u.   |
| M06 SCF energy in solution:  | -1224.19148452 a.u. |
| M06 enthalpy in solution:    | -1223.97023052 a.u. |
| M06 free energy in solution: | -1224.03260752 a.u. |

Cartesian coordinates

| ATOM | X           | Y           | Z           |
|------|-------------|-------------|-------------|
| C    | -1.27081200 | 0.41547400  | -0.13451000 |
| C    | -2.07093700 | 1.54342600  | -0.06306000 |
| C    | -3.46447200 | 1.27084800  | 0.06206200  |
| C    | -3.77437100 | -0.06658200 | 0.04254900  |
| S    | -2.31332400 | -1.01133800 | -0.13062100 |

|    |             |             |             |
|----|-------------|-------------|-------------|
| H  | -1.66339500 | 2.54833400  | -0.10229800 |
| H  | -4.22222300 | 2.04269600  | 0.16047800  |
| C  | -5.12456900 | -0.70705200 | 0.16778700  |
| H  | -5.34823100 | -1.36329500 | -0.68145400 |
| H  | -5.20835800 | -1.31399400 | 1.07748900  |
| H  | -5.90060000 | 0.06314200  | 0.20913700  |
| Ni | 0.53862900  | 0.16906900  | 0.06385400  |
| P  | 2.73931400  | -0.07780400 | 0.04179000  |
| C  | 3.36084800  | -1.41453900 | -1.07661500 |
| H  | 4.45513900  | -1.45694200 | -1.08759200 |
| H  | 2.96781700  | -2.37965000 | -0.74558700 |
| H  | 2.99568300  | -1.23370500 | -2.09081900 |
| C  | 3.68393900  | 1.39477000  | -0.56034000 |
| H  | 3.49689200  | 2.24435500  | 0.10195500  |
| H  | 4.76058200  | 1.19779400  | -0.59661700 |
| H  | 3.33229200  | 1.66397000  | -1.55967200 |
| C  | 3.62313100  | -0.47013200 | 1.62422400  |
| H  | 4.70311900  | -0.56933800 | 1.47268600  |
| H  | 3.43840300  | 0.32353100  | 2.35377500  |
| H  | 3.23540200  | -1.40507500 | 2.03868000  |
| H  | 0.02280200  | 0.45544000  | -1.24756700 |

ts8

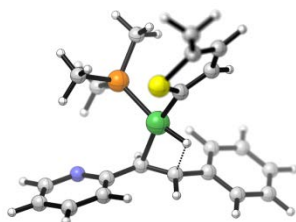

|                              |                     |
|------------------------------|---------------------|
| B3LYP electronic energy:     | -1779.5026276 a.u.  |
| B3LYP enthalpy:              | -1779.063514 a.u.   |
| B3LYP free energy:           | -1779.154008 a.u.   |
| M06 SCF energy in solution:  | -1780.69768559 a.u. |
| M06 enthalpy in solution:    | -1780.25857259 a.u. |
| M06 free energy in solution: | -1780.34906559 a.u. |

Cartesian coordinates

| ATOM | X           | Y           | Z           |
|------|-------------|-------------|-------------|
| C    | -1.80205500 | -0.84223800 | -0.24994000 |
| C    | -2.38392700 | -2.02902000 | 0.13298500  |
| C    | -3.76440200 | -2.16708400 | -0.23273300 |
| C    | -4.26805900 | -1.09978500 | -0.92343600 |
| S    | -3.00444000 | 0.10493700  | -1.12230400 |



|    |             |             |             |
|----|-------------|-------------|-------------|
| H  | -1.83960700 | -2.80100700 | 0.66861600  |
| H  | -4.36358300 | -3.04086300 | 0.00852200  |
| C  | -5.65139200 | -0.90031500 | -1.46680900 |
| H  | -6.14555200 | -0.02156100 | -1.03407400 |
| H  | -5.65213800 | -0.76727100 | -2.55558800 |
| H  | -6.26987000 | -1.77399900 | -1.23898400 |
| Ni | -0.05752400 | -0.11085600 | 0.04785300  |
| P  | -0.62991300 | 1.11364300  | 1.85257800  |
| C  | -1.82454600 | 0.27714500  | 2.98121300  |
| H  | -2.16790200 | 0.95544800  | 3.76870500  |
| H  | -2.67362500 | -0.08495100 | 2.39847200  |
| H  | -1.34019300 | -0.58882800 | 3.44145700  |
| C  | 0.67277800  | 1.71227100  | 3.01976100  |
| H  | 1.41909600  | 2.28132300  | 2.45817600  |
| H  | 0.24293700  | 2.33889400  | 3.80831000  |
| H  | 1.16842000  | 0.85462100  | 3.48517600  |
| C  | -1.50558700 | 2.67150200  | 1.39190200  |
| H  | -1.85702100 | 3.20761700  | 2.27943200  |
| H  | -0.82324900 | 3.31511900  | 0.83062600  |
| H  | -2.35669000 | 2.42386400  | 0.75277300  |
| C  | 2.36169400  | 4.09170100  | -0.27868800 |
| C  | 1.93638700  | 4.47933500  | -1.54871200 |
| C  | 1.44977700  | 3.48546200  | -2.40029700 |
| C  | 1.41897100  | 2.16817700  | -1.95823900 |
| C  | 1.88222400  | 1.86239100  | -0.66124700 |
| N  | 2.33929900  | 2.83044800  | 0.16553900  |
| H  | 1.09717100  | 3.73367800  | -3.39749000 |
| H  | 2.74264300  | 4.83339500  | 0.42205300  |
| H  | 1.98066100  | 5.51956000  | -1.85397500 |
| H  | 1.03284900  | 1.38652800  | -2.60319700 |
| C  | 1.89352400  | 0.49645300  | -0.10611900 |
| H  | 2.38826800  | 0.42199700  | 0.85654800  |
| C  | 1.74979500  | -0.66762400 | -0.89686700 |
| H  | -0.02090500 | -1.00238500 | -1.10331600 |
| H  | 1.74615600  | -0.54883700 | -1.97754000 |
| C  | 2.22437800  | -2.00633100 | -0.45478300 |
| C  | 2.57472600  | -2.95945300 | -1.42381100 |
| C  | 2.35089700  | -2.35802000 | 0.89998900  |
| C  | 3.04602200  | -4.21905800 | -1.05584800 |
| H  | 2.47732100  | -2.70737900 | -2.47700400 |
| C  | 2.82202600  | -3.61617300 | 1.26877800  |
| H  | 2.07023400  | -1.64497700 | 1.66896700  |
| C  | 3.17277300  | -4.55295600 | 0.29324000  |
| H  | 3.31380700  | -4.93910700 | -1.82384500 |

|   |            |             |            |
|---|------------|-------------|------------|
| H | 2.91235900 | -3.86802100 | 2.32173600 |
| H | 3.53771300 | -5.53395700 | 0.58294200 |

ts9

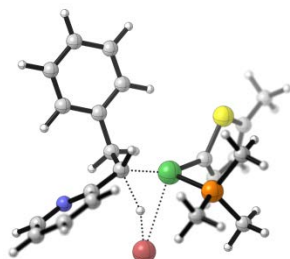

|                              |                     |
|------------------------------|---------------------|
| B3LYP electronic energy:     | -1793.2736138 a.u.  |
| B3LYP enthalpy:              | -1792.822082 a.u.   |
| B3LYP free energy:           | -1792.918635 a.u.   |
| M06 SCF energy in solution:  | -1794.65901039 a.u. |
| M06 enthalpy in solution:    | -1794.20747839 a.u. |
| M06 free energy in solution: | -1794.30403139 a.u. |

Cartesian coordinates

| ATOM | X           | Y           | Z           |
|------|-------------|-------------|-------------|
| Ni   | -0.50793000 | -0.32667800 | -0.05481700 |
| Br   | 1.04557700  | -2.45254000 | 1.58096700  |
| P    | -0.94469200 | -1.84854500 | -1.55668800 |
| C    | -1.93038600 | -1.24125300 | -2.98772600 |
| H    | -2.12616200 | -2.05655700 | -3.69139900 |
| H    | -2.87437200 | -0.82892000 | -2.62687600 |
| H    | -1.38158300 | -0.44832100 | -3.50288900 |
| C    | 0.52033200  | -2.63245900 | -2.35385700 |
| H    | 1.18041400  | -3.03312800 | -1.58120500 |
| H    | 0.20681100  | -3.44158100 | -3.02138400 |
| H    | 1.06866800  | -1.88622700 | -2.93301600 |
| C    | -1.88983500 | -3.28226100 | -0.90827300 |
| H    | -2.06232100 | -4.01623800 | -1.70163800 |
| H    | -1.31351400 | -3.73866900 | -0.10012500 |
| H    | -2.83953100 | -2.93080000 | -0.50293800 |
| C    | 1.39375800  | 0.37118700  | -0.27673100 |
| H    | 1.00870500  | -1.16643100 | 0.48321800  |
| C    | 4.75096700  | -0.15308500 | 1.09973300  |
| C    | 5.49110800  | -0.71211100 | 0.05939800  |
| C    | 4.84976900  | -0.90008800 | -1.16632000 |
| C    | 3.51313600  | -0.54019000 | -1.28844400 |
| C    | 2.83701700  | -0.00246600 | -0.17751500 |
| N    | 3.46523000  | 0.19757500  | 0.99422200  |

|   |             |             |             |
|---|-------------|-------------|-------------|
| H | 5.38573500  | -1.31651100 | -2.01482600 |
| H | 5.21372900  | 0.02802100  | 2.06847700  |
| H | 6.53331800  | -0.97771700 | 0.20275100  |
| C | -2.35166300 | -0.21979000 | 0.40781300  |
| C | -2.98467100 | -0.81645200 | 1.47458900  |
| S | -3.47437000 | 0.89703000  | -0.35744100 |
| C | -4.33122100 | -0.37499600 | 1.68926700  |
| H | -2.49638300 | -1.55320200 | 2.10509800  |
| C | -4.76338300 | 0.55556700  | 0.78317500  |
| H | -4.95965100 | -0.73834200 | 2.49716900  |
| C | -6.09473200 | 1.24176900  | 0.70765800  |
| H | -6.75080500 | 0.86586500  | 1.49836900  |
| H | -6.00576700 | 2.32700100  | 0.83663700  |
| H | -6.59512900 | 1.06862700  | -0.25246400 |
| C | 0.86985200  | 1.36199900  | 0.76266000  |
| H | -0.19847600 | 1.12564400  | 1.07020100  |
| H | 1.44457700  | 1.21736400  | 1.68058600  |
| C | 0.87017100  | 2.81090900  | 0.31618100  |
| C | -0.28092200 | 3.42547300  | -0.19086600 |
| C | 2.05895600  | 3.55201900  | 0.38875800  |
| C | -0.24403900 | 4.75239400  | -0.62608400 |
| H | -1.21448000 | 2.86973800  | -0.23211100 |
| C | 2.09465400  | 4.87673600  | -0.04589200 |
| H | 2.95271100  | 3.08284700  | 0.79025900  |
| C | 0.94353500  | 5.48136700  | -0.55725000 |
| H | -1.14749400 | 5.21627300  | -1.01241300 |
| H | 3.02208800  | 5.43927700  | 0.01869200  |
| H | 0.97174500  | 6.51405400  | -0.89320100 |
| H | 2.99200600  | -0.66296500 | -2.23302500 |
| H | 1.18129000  | 0.69382000  | -1.30275800 |

ts10

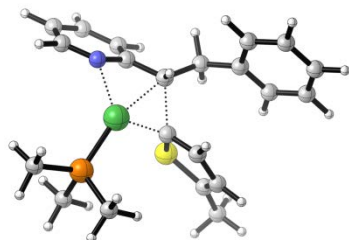

|                             |                     |
|-----------------------------|---------------------|
| B3LYP electronic energy:    | -1779.4916788 a.u.  |
| B3LYP enthalpy:             | -1779.049190 a.u.   |
| B3LYP free energy:          | -1779.137471 a.u.   |
| M06 SCF energy in solution: | -1780.68508891 a.u. |
| M06 enthalpy in solution:   | -1780.24259991 a.u. |

M06 free energy in solution: -1780.33088091 a.u.

Cartesian coordinates

| ATOM | X           | Y           | Z           |
|------|-------------|-------------|-------------|
| C    | -0.26567300 | -0.68847500 | 0.11079800  |
| C    | -1.08429700 | -1.50873700 | -0.65423700 |
| C    | -1.57032900 | -2.66733800 | 0.02414500  |
| C    | -1.18023400 | -2.76226800 | 1.33361800  |
| S    | -0.16088200 | -1.38740800 | 1.74647800  |
| H    | -1.35079200 | -1.26879000 | -1.67783900 |
| H    | -2.21093300 | -3.40789900 | -0.44654200 |
| C    | -1.49758800 | -3.83383500 | 2.33210000  |
| H    | -0.59854700 | -4.36012200 | 2.67712200  |
| H    | -1.99746900 | -3.43457900 | 3.22325700  |
| H    | -2.16316100 | -4.57635900 | 1.88112100  |
| Ni   | 1.32388500  | 0.24302500  | -0.43346800 |
| P    | 2.84931600  | -1.22160100 | -0.96625600 |
| C    | 2.23637300  | -2.63403300 | -1.99331400 |
| H    | 3.00219500  | -3.40457600 | -2.13168700 |
| H    | 1.35871100  | -3.06765900 | -1.50697800 |
| H    | 1.92478400  | -2.26049600 | -2.97307200 |
| C    | 4.34724600  | -0.68823000 | -1.92240500 |
| H    | 4.88331300  | 0.07789000  | -1.35499100 |
| H    | 5.02612000  | -1.52366100 | -2.12507500 |
| H    | 4.03241700  | -0.24541900 | -2.87163800 |
| C    | 3.62491700  | -2.10652400 | 0.46497600  |
| H    | 4.31826100  | -2.88733800 | 0.13362400  |
| H    | 4.16613700  | -1.38757100 | 1.08658700  |
| H    | 2.83743600  | -2.55405700 | 1.07689100  |
| C    | 2.59662600  | 3.05921500  | -0.14987800 |
| C    | 2.73792700  | 3.65587200  | 1.09224700  |
| C    | 1.76632300  | 3.38237100  | 2.07288900  |
| C    | 0.69015900  | 2.57065300  | 1.76418300  |
| C    | 0.55717600  | 2.06658900  | 0.44331700  |
| N    | 1.54336200  | 2.28989300  | -0.49629200 |
| H    | 1.85966600  | 3.80715700  | 3.06863900  |
| H    | 3.34678000  | 3.19550200  | -0.92608300 |
| H    | 3.58524400  | 4.30045700  | 1.30018000  |
| H    | -0.05791300 | 2.33393200  | 2.51265600  |
| C    | -0.56140000 | 1.20758900  | -0.01655400 |
| H    | -0.70601500 | 1.33778000  | -1.09144700 |
| C    | -1.89413400 | 1.39697400  | 0.74060300  |
| H    | -1.89009500 | 0.83531200  | 1.67893200  |
| H    | -1.94844700 | 2.46088900  | 1.01190500  |

|   |             |             |             |
|---|-------------|-------------|-------------|
| C | -3.13334000 | 1.05557700  | -0.06158000 |
| C | -3.95921600 | -0.01848600 | 0.29009800  |
| C | -3.49833200 | 1.84185100  | -1.16524600 |
| C | -5.11445000 | -0.30433800 | -0.44077700 |
| H | -3.68869800 | -0.64240700 | 1.13682600  |
| C | -4.64792700 | 1.55695200  | -1.90176300 |
| H | -2.87874000 | 2.69092700  | -1.44632300 |
| C | -5.46211600 | 0.48090600  | -1.54028700 |
| H | -5.74113200 | -1.14335700 | -0.15064500 |
| H | -4.91262800 | 2.17946500  | -2.75217200 |
| H | -6.36070300 | 0.25985500  | -2.10949900 |
